1 **Title**

2 Towards HCP-Style Macaque Connectomes: 24-Channel 3T Multi-Array Coil, MRI Sequences and  
3 Preprocessing

4

5 **Authors**

6 Joonas A. Autio<sup>1</sup>, Matthew F. Glasser<sup>2,3,4</sup>, Takayuki Ose<sup>1</sup>, Chad J. Donahue<sup>2</sup>, Matteo Bastiani<sup>5, 6</sup>,  
7 Masahiro Ohno<sup>1</sup>, Yoshihiko Kawabata<sup>7</sup>, Yuta Urushibata<sup>8</sup>, Katsutoshi Murata<sup>8</sup>, Kantaro Nishigori<sup>1,9</sup>,  
8 Masataka Yamaguchi<sup>1</sup>, Yuki Hori<sup>1</sup>, Atsushi Yoshida<sup>1</sup>, Yasuhiro Go<sup>10,11,12</sup>, Timothy S. Coalson<sup>2</sup>, Saad  
9 Jbabdi<sup>5</sup>, Stamatios N. Sotiropoulos<sup>5,6,13</sup>, Stephen Smith<sup>5</sup>, David C. Van Essen<sup>2</sup>, Takuya Hayashi<sup>1</sup>

10

11 **Affiliations**

12 <sup>1</sup>Laboratory for Brain Connectomics Imaging, RIKEN Center for Biosystems Dynamics Research, Kobe,  
13 Japan

14 <sup>2</sup>Department of Neuroscience, Washington University School of Medicine, St Louis, Missouri USA

15 <sup>3</sup>Department of Radiology, Washington University School of Medicine, St Louis, Missouri, USA

16 <sup>4</sup>St. Luke's Hospital, St. Louis, Missouri, USA

17 <sup>5</sup>Wellcome Centre for Integrative Neuroimaging - Centre for Functional Magnetic Resonance Imaging  
18 of the Brain (FMRIB), University of Oxford, Oxford, United Kingdom

19 <sup>6</sup>Sir Peter Mansfield Imaging Centre, School of Medicine, University of Nottingham, Nottingham,  
20 United Kingdom

21 <sup>7</sup>Takashima Seisakusho Co., Ltd, Tokyo, Japan

22 <sup>8</sup>Siemens Healthcare Japan, Tokyo, Japan

23 <sup>9</sup>Sumitomo Dainippon Pharma Co., Ltd, Osaka, Japan

24 <sup>10</sup>Cognitive Genomics Research Group, Exploratory Research Center on Life and Living Systems,  
25 National Institutes of Natural Sciences, Okazaki, Japan

26 <sup>11</sup>Department of System Neuroscience, National Institute for Physiological Sciences, Okazaki, Japan

27 <sup>12</sup>Department of Physiological Sciences, School of Life Science, SOKENDAI (The Graduate University  
28 for Advanced Studies), Okazaki, Japan

29 <sup>13</sup>National Institute for Health Research (NIHR) Nottingham Biomedical Research Centre, Queens  
30 Medical Centre, Nottingham, UK

31

32 **Keywords**

33 Macaque, Primate, Human Connectome Project, Parallel Imaging, Cortex, Resting-state, Diffusion

34

35 **Corresponding author**

36 Takuya Hayashi

37 Laboratory for Brain Connectomics Imaging

38 RIKEN Center for Biosystems Dynamics Research

39 6-7-3 Minatojima-minamimachi, Chuo-ku, Kobe 650-0047, Japan

40 Tel: 81-78-304-7140

41 Fax: 81-78-304-7141

42 E-mail: [takuya.hayashi@riken.jp](mailto:takuya.hayashi@riken.jp)

43 **Abstract:**

44 Macaque monkeys are an important model species for understanding cortical organization of  
45 primates, yet tools and methods for noninvasive image acquisition (e.g. MRI RF coils and pulse  
46 sequence protocols) and image data preprocessing have lagged behind those developed for humans.  
47 To resolve the structural and functional characteristics of the relatively thin macaque cortex, high  
48 spatial, temporal, and angular resolutions are required while maintaining high signal-to-noise ratio  
49 to ensure good image quality. To address these challenges, we developed a macaque 24-channel  
50 receive coil for 3-T MRI with parallel imaging capabilities. This coil enabled adaptation of the Human  
51 Connectome Project (HCP) image acquisition protocols to the macaque brain. We also adapted HCP  
52 preprocessing methods optimized for the macaque brain, including spatial minimal preprocessing of  
53 structural, functional MRI (fMRI), and diffusion MRI (dMRI). The coil provided high signal-to-noise  
54 ratio and high efficiency in data acquisition, allowing four- and five-fold acceleration for dMRI and  
55 fMRI, respectively. Automated parcellation of cortex, reconstruction of cortical surface, removal of  
56 artefacts and nuisance signals in fMRI, and distortion correction of dMRI performed well, and the  
57 overall quality of basic neurobiological measures was comparable with those for the HCP. The  
58 resulting HCP-style in vivo macaque MRI data show considerable promise for analyzing cortical  
59 architecture and functional and structural connectivity using advanced methods that have previously  
60 only been available for humans.

61

62 **Highlights**

- 63 ➤ 24-channel 3T MR receive coil designed for the smaller macaque brain.  
64 ➤ In vivo macaque imaging protocols adapted according to guidelines from the HCP.  
65 ➤ Parallel imaging yields five- and four-fold acceleration in fMRI and dMRI sampling.  
66 ➤ HCP's minimal preprocessing and denoising pipelines adapted for macaques.  
67 ➤ The multi-modal MRI data show considerable promise for HCP-style analyses.

68

## 69 **Introduction**

70 Old World monkeys are an important neuroscientific model for understanding primate  
71 neuroanatomy (Brodmann K., 1905; Felleman and Van Essen, 1991; Van Essen et al., 2001). Macaque  
72 monkeys have provided insights about neurovascular coupling (Goense and Logothetis, 2008), neural  
73 wiring (Markov et al., 2014) and the evolution of the human brain's functional connectome  
74 (Passingham, 2009; Wang et al., 2012). However, macaques are separated from humans by 25  
75 million years of evolution, and are known to have substantial brain differences despite being  
76 members of the same primate order. Recent imaging studies have revealed substantial  
77 neuroanatomical differences between macaques and humans, for example in language connectivity  
78 or proportion of cortex devoted to lightly myelinated association areas (Donahue et al., 2018;  
79 Glasser et al., 2014; Rilling et al., 2008). At the level of cortical areas, high confidence homologies  
80 (i.e., a common evolutionary origin) have only been firmly established for a modest number of early  
81 sensory and motor areas (Van Essen and Dierker, 2007) but are more challenging to delineate for  
82 higher cognitive regions such as prefrontal cortex (Mars et al., 2018b, 2018a). Improvements to in  
83 vivo neuroimaging acquisition and preprocessing may help address several outstanding questions:  
84 what is the optimal interspecies registration between macaque and human cerebral cortices? What  
85 are the optimal methods for non-invasively estimating functional and structural connectivity as  
86 assessed by comparison with gold standard invasive tracers in macaques? What brain networks are  
87 shared and which ones are different between macaques and humans?

88

89 Recently, the Human Connectome Project (HCP) developed an improved, integrated approach to  
90 brain imaging acquisition, analysis, and data sharing (Glasser et al., 2016b). The overall goal of this  
91 approach is to increase the sensitivity and precision with which brain imaging studies are conducted  
92 in the hope that this will yield results that are more neurobiologically interpretable and more  
93 accurately comparable across individuals and studies. The HCP-style approach has seven core tenets  
94 (Glasser et al., 2016b): 1) Acquire as much high-quality data from as many subjects as possible. 2)  
95 Acquire data with maximum feasible resolution in space and time 3) Preserve high data quality  
96 throughout preprocessing by removing physical distortions, subject movement within and between  
97 scans, image intensity inhomogeneities, and artefacts and nuisance signals without blurring the data  
98 or altering the neural signals (Andersson et al., 2003; Andersson and Sotiropoulos, 2016; Glasser et  
99 al., 2013, 2016b, 2017; Griffanti et al., 2014; Salimi-Khorshidi et al., 2014). 4) Use appropriate  
100 geometrical models—surfaces for the sheet-like cerebral cortex and volumes for globular subcortical  
101 structures (Glasser et al., 2013). 5) Align brain areas across subjects, not cortical folds (Robinson et  
102 al., 2018, 2014). 6) Use a data-driven structurally and functionally sensible parcellation, ideally

103 derived from multiple modalities (Glasser et al., 2016a). 7) Share results as data files in neuroimaging  
104 databases such as the Brain Analysis Library of Spatial maps and Atlases (BALSA) database (Van  
105 Essen et al., 2017), not just 3D coordinates. Following the HCP-Style approach leads to dramatic  
106 improvements in spatial localization precision in humans relative to traditional brain imaging  
107 methods (Coalson et al., 2018). Therefore, we sought to bring this improved brain imaging approach  
108 to non-human primate studies.

109

110 Monkey brains present distinct imaging-related challenges relative to human brains. The macaque  
111 brain is 10-fold smaller in weight, and its neocortex is ~25% thinner (average 2.0 mm vs 2.6 mm;  
112 (Donahue et al., 2018; Glasser et al., 2016b)). These facts necessitate increased spatial resolution to  
113 achieve comparable neuroanatomical resolution; however, smaller voxels are associated with  
114 decreased signal-to-noise ratio (SNR). One way to improve SNR is to scan at ultrahigh magnetic field  
115 strength (e.g., 7T). However, 7T scanners are not widely available and in any event pose technical  
116 challenges such as increased  $B_0$  and  $B_1$  inhomogeneity (Van de Moortele et al., 2009). For  
117 conventional 3T scanners, one key factor to enable high-resolution whole-brain imaging in macaques  
118 is to optimize the multi-channel radiofrequency (RF) receiver coil. Using a coil matched to macaque  
119 head size with a large number of small coil elements can yield improvements in SNR. Multi-channel  
120 signal acquisition using advanced 3T research scanners in humans enables parallel imaging both in  
121 the slice direction (i.e. multiband) (Moeller et al., 2010; Setsompop et al., 2012) and within the slice  
122 plane (generalized auto-calibrating partially parallel acquisitions [GRAPPA]) (Griswold et al., 2002).  
123 Although several studies have devised multichannel receive coils for macaque whole-brain imaging  
124 at 3T (Helms et al., 2013; Janssens et al., 2013, 2013; Khachaturian, 2010) and 7T (Gilbert et al.,  
125 2016; Mareyam et al., 1823), they have not to date demonstrated robust whole-brain mapping of  
126 multi-modal MRI measures such as those acquired by HCP. Achieving comparable results in  
127 macaques requires not only higher resolution and SNR but also low geometric distortion and signal  
128 intensity inhomogeneity, and requires optimized hardware, sequences, and post-processing  
129 techniques.

130

131 In this study, we designed and built a 24 channel receive coil with a geometry optimized for parallel  
132 imaging of anesthetized macaque monkeys at 3T. Capitalizing on the accelerated imaging capabilities  
133 of the coil, we adapted HCP-style data acquisition protocols for structural MRI (Glasser et al., 2013),  
134 fMRI (Smith et al., 2013) and diffusion MRI (dMRI) (Sotiropoulos et al., 2013; Uğurbil et al., 2013) to  
135 the small size of the macaque brain, as well as the HCP-style minimal spatial preprocessing and  
136 denoising pipelines (Andersson and Sotiropoulos, 2016; Glasser et al., 2018, 2016a, 2013; Salimi-

137 Khorshidi et al., 2014, 2014). We generate accurate white and pial cortical surfaces, subcortical  
138 segmentations, myelin maps, and cortical thickness maps from structural MRI, surface aligned fMRI  
139 dense timeseries that have spatial artefacts and nuisance signals removed, resting state functional  
140 networks, and diffusion-based fiber orientation estimates, example tractography connections, and  
141 cortical neurite orientation and dispersion imaging (NODDI) (Zhang et al., 2012). The spatial  
142 resolution of the structural and functional imaging modalities are scaled to the macaque cortical  
143 thickness, thus providing comparable neuroanatomical resolution to HCP-style human imaging and  
144 facilitating comparison of connectomes between macaques and humans.

145

## 146 **Methods and Materials**

147 Experiments were performed using a 3T clinical MRI scanner (MAGNETOM Prisma, Siemens,  
148 Erlangen, Germany) equipped with 80 mT/m gradients (XR 80/200 gradient system with slew rate  
149 200 T/m/s) and a 2-channel B<sub>1</sub> transmit array (TimTX TrueForm). The animal experiments were  
150 conducted in accordance with the institutional guidelines for animal experiments and animals were  
151 maintained and handled in accordance with the Guide for the Care and Use of Laboratory Animals of  
152 the Institute of Laboratory Animal Resources (ILAR; Washington, DC, USA). All animal procedures  
153 were approved by the Animal Care and Use Committee of the Kobe Institute of Riken (MA2008-03-  
154 11). We also used HCP data as a reference for data quality. The use of HCP data was approved by the  
155 institutional ethical committee (KOB-IRB-16-24).

156

### 157 *Macaque 24-channel coil*

158 The coil frame geometry was designed using a 3D digital design software (Rhino 5, McNeel,  
159 Seattle, USA) to closely fit the head geometry of the animal with largest head dimensions (anterior  
160 posterior 109 mm, left-right 99 mm, superior-inferior 84 mm) (Fig. 1A) in our macaque head MRI  
161 database. The database included structural scans of 133 individual subjects from three macaque  
162 species (*Macaca fuscata*, N=4; *Macaca fascicularis*, N=122; *Macaca mulatta*, N=7). The largest  
163 animal's MRI data was used to delineate the contour of the head surface and imported into the 3D  
164 digital design software where the inner surface of the coil was designed to closely fit the surface of  
165 the head (Fig. 1A). Next, 16 pentagonal and 8 hexagonal elements were configured over the surface  
166 (Fig. 1B), resembling a soccer-ball coil design (Wiggins et al., 2006). These elements were arranged in  
167 three quasi-horizontal arrays to maximize parallel encoding power of multiband EPI sequences for  
168 animals placed in the supine position and axial slices. The inner body of the device was constructed  
169 using a 3D printer (M200, Zortrax, Olsztyn, Poland) (Fig. 1C), and the coil elements were arranged  
170 over its external surface. Initially the coil elements were wired using a thin copper foil-plate (width 5

171 mm); however, because the plate elements markedly interfered with  $B_1$  transmission (data not  
172 shown), the coil elements were rewired using thin coaxial copper cables (Fig. 1D, cable diameter 0.7  
173 mm; cable loop maximum mean diameter  $48.6 \pm 8.7$  mm) (Wiggins et al., 2009), which substantially  
174 reduced interference with  $B_1$  transmission. The elements were arranged to continuously (critically)  
175 overlap each other to reduce coupling between nearest-neighbor coils (Roemer et al., 1990), and  
176 those in the caudal-posterior part were designed to have relatively larger diameter (35% larger in  
177 maximum diameter) to increase sensitivity to distant brain regions (e.g. cerebellum) while reducing  
178 sensitivity to closer regions (e.g. occipital cortex). The two elements placed over the eyes were also  
179 relatively large in diameter to allow video recording of eyes and eyelids for monitoring depth of  
180 anesthesia. In addition, capacitors were arranged vertically against the surface of the coil frame to  
181 reduce interaction with  $B_1$ -transmission (Fig. 1D). Fig. 1E shows the circuits, which followed a  
182 standard design (Wiggins et al., 2006) consisting of diode detuning trap, cable trap and bias T  
183 connected to low input-impedance preamplifiers (Siemens Healthcare, Erlangen, Germany). The  
184 completed coil is shown in Fig. 1F.

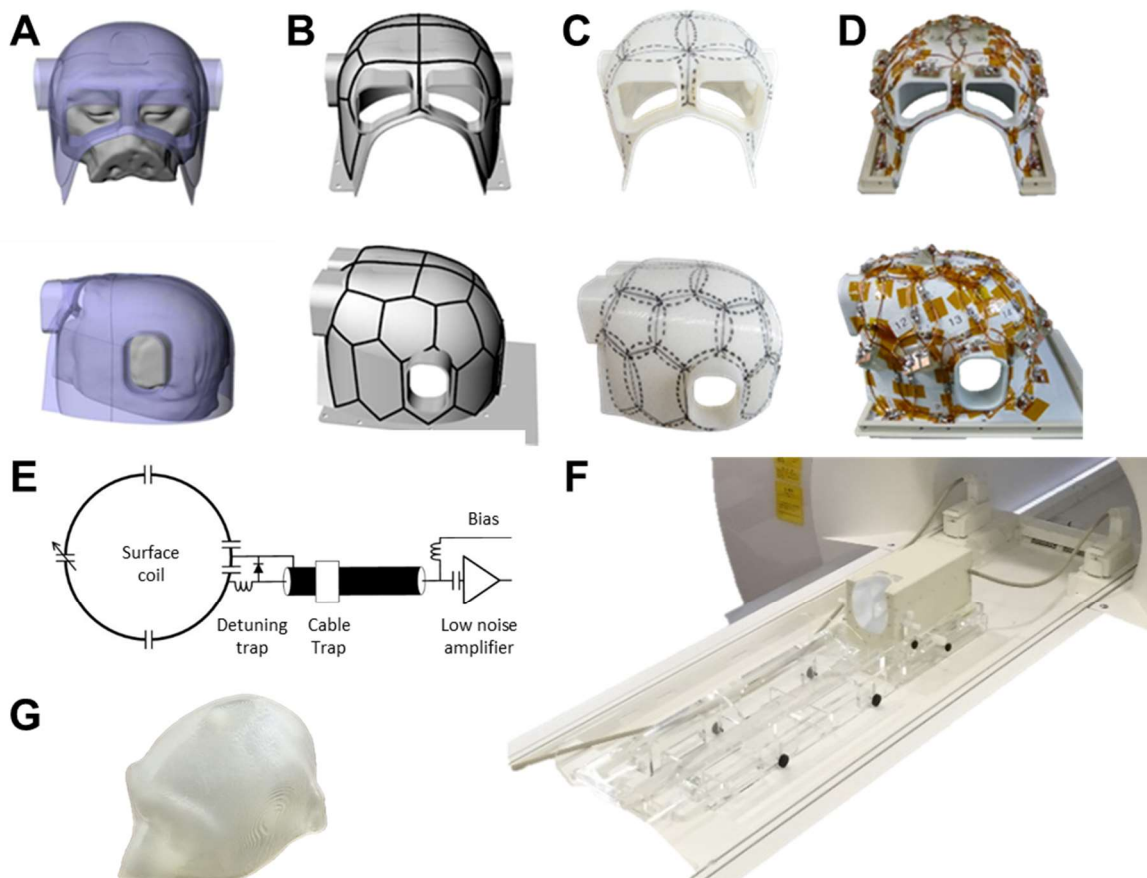

**Figure 1** The design and development of macaque 24-channel receive-only coil. **(A)** Design of coil geometry and **(B)** element locations. **(C)** Outlook of element alignment on a 3D print. **(D)** Coil with final element arrangements. **(D)**

Schematic of a coil element circuit. (E) Coil circuitry. (F) Coil outlook with animal holder attached to the gantry of the MRI scanner. (G) Macaque head phantom.

185

### 186 *Coil Evaluation*

187 Coil elements were assessed for the ratio of loaded to unloaded quality factor  $Q$ , nearest-neighbor  
188 coupling, and active detuning. Element coupling was also estimated with gradient off-line noise  
189 correlation measurements. Two phantoms (NaCl 0.9%, gadolinium 0.1 mM) were designed and  
190 prepared using a 3D printer: one to closely match the inner-surface of the coil (Fig. 1G) used for  $B_1$   
191 quality evaluation and the other to match to a typical macaque brain size used for geometry-  
192 dependent noise amplification.  $B_1$ -transmission was assessed with a vendor provided flip-angle  
193 sequence.  $B_1$ -receive field was estimated using a gradient-echo sequence and by calculating the  
194 signal ratio between 24-channel and body receive coils. Finally, geometry-dependent noise  
195 amplification due to parallel imaging was evaluated using gradient-echo imaging and GeneRalized  
196 Autocalibrating Partial Parallel Acquisition (GRAPPA) (Griswold et al., 2002) in-plane acceleration  
197 factors of 2, 3 and 4.

198

### 199 *Data Acquisition Strategy – Resolution and Contrast Considerations*

200 To improve comparability of macaque and human brains, our data acquisition strategy sought to  
201 obtain data following methodologies introduced by the HCP (3T protocols) (Glasser et al., 2016b,  
202 2013; Smith et al., 2013; Sotiropoulos et al., 2013; Uğurbil et al., 2013). To accurately model the  
203 cortical pial and white matter surfaces, structural imaging spatial resolution target (0.5 mm isotropic  
204 in macaques, equivalent to 0.8mm in humans) was based on preliminary evaluations of macaque  
205 cortical thickness (Glasser et al., 2014) and corresponds to approximately half of the minimum  
206 cortical thickness in the cortex, which is  $\approx 1$  mm in macaques (Donahue et al., 2018) and 1.6 mm in  
207 humans (Glasser et al., 2016b). Tissue contrast (grey and white matter and CSF) associated imaging  
208 parameters (e.g. inversion time, flip angle, repetition time and echo-time) were experimentally  
209 adjusted to produce robust surface estimation within the FreeSurfer pipelines, in conjunction with  
210 maximizing intracortical  $T1w/T2w$  (myelin-related) contrast. The fMRI spatial resolution selection  
211 (1.25 mm) was based on preliminary evaluations of the 5<sup>th</sup> (low) percentile of cortical thickness, a  
212 similar strategy in humans by the HCP (resolution of 2 mm) (Glasser et al., 2016b). The temporal  
213 sampling rate (TR=0.75 sec) was maximized according to tSNR (see below) which was close to the  
214 human protocol (0.72 sec; Smith et al., 2013). For dMRI, the smallest spatial resolution within the  
215 practical limitation of the SNR was chosen using the same b-value scheme ( $b = 1000, 2000$  and  $3000$   
216  $s/mm^2$ ) as in the HCP (Sotiropoulos et al., 2013) with 500 directions (more than the 270 in the HCP).  
217 Pilot studies for each modality included assessments for varying spatial resolution, flip-angle, RF



218 transmission power, pulse length, inversion time (TI), fat suppression, multiband acceleration factor,  
219 in-plane acceleration factor, repetition time (TR), echo-time (TE), echo-spacing, spectral width,  
220 phase encoding direction, phase partial Fourier, phase oversampling, image resolution and diffusion  
221 directions.

222

### 223 *Structural Acquisition Protocol*

224 T1w images were acquired using a 3D Magnetization Prepared Rapid Acquisition Gradient Echo  
225 (MPRAGE) (Mugler and Brookeman, 1990) sequence (0.5 mm isotropic, FOV=128x128x112 mm,  
226 matrix=256x256 slices per slab=224, coronal orientation, readout direction of inferior (I) to superior  
227 (S), phase oversampling=15%, averages=3, TR=2200 ms, TE=2.2 ms, TI=900 ms, flip-angle=8.3°,  
228 bandwidth=270 Hz/pixel, no fat suppression, GRAPPA=2, turbo factor=224 and pre-scan  
229 normalization). The value of TI (900 ms) was selected based on the contrast between white and grey  
230 matter and SNR. T2w images were acquired using a Sampling Perfection with Application optimized  
231 Contrast using different angle Evolutions (SPACE) sequence (Mugler et al., 2000) (0.5 mm isotropic,  
232 FOV=128x128x112mm, matrix=256x256, slice per slab=224, coronal orientation, readout direction I  
233 to S, phase oversampling=15%, TR=3200 ms, TE=562 ms, bandwidth=723 Hz/pixel, no fat  
234 suppression, GRAPPA=2, turbo factor=314, echo train length=1201 ms and pre-scan normalization).  
235 The total acquisition time for structural scans was 22 min (17 min for T1w and 5 min for T2w).

236

### 237 *Functional Acquisition Protocol*

238 To reduce susceptibility induced geometric distortions and signal loss, the data was acquired in LR  
239 and RL directions. Functional scans were acquired using gradient-echo EPI (FOV=95x95 mm,  
240 matrix=76x76, 1.25 mm isotropic, interleaved slice order, and number of slices=50 covering the  
241 whole brain).

242

243 An empirical estimate of the effect of multiband slice acceleration factor on fMRI tSNR was obtained  
244 by a procedure similar to that used by the HCP (Smith et al., 2013). Briefly, simultaneous slice  
245 excitation enables a multiband factor fold reduction in the TR and subsequent incomplete T1-  
246 recovery leads to a reduction in the optimal (Ernst) flip angle and thus in tSNR. However, as more  
247 data volumes can be acquired in a matched time window, a more relevant estimate for the data  
248 quality can be calculated by multiplying the tSNR with a square root of acquired data timepoints.  
249 Therefore, tSNR was estimated with a matched image acquisition time (10 min) using a range of  
250 multiband factors (1, 3, 5, 6 and 8), minimum excitation and refocus RF-pulse lengths (with constant



251 spectral width), TRs (3850, 1300, 840, 680 and 530 ms), corresponding (blood) Ernst angles (86, 65,  
252 55, 51 and 45°) and a fixed bandwidth (1370 Hz/pixel).

253

254 These trials led us to select the imaging parameters (multiband factor=5, TR=755 ms, number of  
255 slices=45, flip-angle=55°, TE=30 ms, bandwidth=1370 Hz/pixel and echo spacing=0.95 ms and pre-  
256 scan normalization) for the fMRI data acquisition. To maintain the temporal autocorrelation  
257 structure of the data, long continuous runs were used (single-run scan time 51 min, 4096 frames, RL  
258 and LR directions resulting in a total acquisition time of 102 min).

259

#### 260 *Field-Map Acquisition Protocol*

261 The  $B_0$  field-map was estimated using a pair of spin-echo EPI images with opposite phase encoding  
262 directions (Andersson et al., 2003) (LR and RL directions, FOV=95x95 mm, 1.25 mm isotropic  
263 resolution, axial orientation, slices=45, interleaved data acquisition, TE=46.2 ms, 6/8 phase partial  
264 Fourier, bandwidth=1370 Hz/pixel, echo spacing=0.95 ms, fat suppression and pre-scan  
265 normalization). The  $B_1$  transmit field-map was obtained using vendor provided flip-angle sequence  
266 (Siemens,  $B_1$ -map) (FOV=128x128x58mm, gap=2 mm, gaps acquired in a separate run, 2 mm  
267 isotropic, TR=10 s, target flip-angle=90°).

268

#### 269 *Diffusion Acquisition Protocol*

270 Diffusion scans were acquired with a 2D spin-echo EPI Stejskal-Tanner sequence (Stejskal and  
271 Tanner, 1965), utilizing monopolar gradient scheme and gradient pre-emphasis to reduce eddy  
272 currents. The monopolar gradients allowed decreased TE and significantly improved SNR without  
273 significant degradation due to eddy currents (in part due to the correction for eddy currents in post  
274 processing) (Andersson et al., 2003). The diffusion scheme contained three shells with b-values of  
275 1000, 2000 and 3000  $s/mm^2$  (diffusion time=26.5 ms, gradient duration=17.8 ms and amplitude=69.7  
276 T/m), in accordance with the HCP (Sotiropoulos et al., 2013), but the number of direction ( $N_D$ ) was  
277 increased to 500 uniformly distributed over the sphere, as compared with that in the HCP ( $N_D=270$ ).  
278 Furthermore, 52  $b=0 s/mm^2$  volumes were evenly distributed across the diffusion scheme to reduce  
279 CSF pulsation related uncertainty in the  $b=0 s/mm^2$  image signal intensity. In contrast to the HCP, we  
280 used GRAPPA (acceleration factor= 2) to reduce image distortions and accelerate the sequence in  
281 plane with a more recent version of the multiband sequence than was available for the original  
282 young adult HCP (Uğurbil et al., 2013). To correct for geometric distortions, the diffusion scheme  
283 was obtained using two scans with reversed phase encoding directions (LR and RL) and different  
284 number and directions of diffusion gradient (252 and 248) (Andersson and Sotiropoulos, 2016). The

285 following imaging parameters were applied: FOV=90 mm, matrix=100×100, 0.9 mm isotropic  
286 resolution, number of slices=60, interleaved slice acquisition, multiband factor=2, GRAPPA= 2,  
287 TR=3400 ms, flip-angle=90, TE=73 ms, 6/8 phase partial Fourier, echo spacing=1.12 ms,  
288 bandwidth=1086 Hz/pixel, pre-scan normalization on and fat suppression using gradient reversal  
289 technique (Gomori et al., 1988). Total acquisition time was 30 min, during which frequency drift was  
290 small ( $\approx 0.5$  Hz/min). By applying slice and in-plane accelerations (2×2), the acquisition time was  
291 reduced by more than 3-fold than without acceleration. However, the shortest possible TR was not  
292 used, in order to preserve SNR (to allow near-complete longitudinal magnetization recovery).

293

#### 294 *Animal experiments*

295 Macaque monkeys (mean 5380 g, range 3030–8850 g) were initially sedated with intramuscular  
296 injection of dexmedetomidine (4.5  $\mu\text{g}/\text{kg}$ ) and ketamine (6 mg/kg). A catheter was inserted into the  
297 caudal artery for blood-gas sampling, and tracheal intubation was performed for steady controlled  
298 ventilation using an anesthetic ventilator (Cato, Drager, Germany). End-tidal carbon dioxide was  
299 monitored and used to adjust ventilation rate (0.2 to 0.3 Hz) and end-tidal volume. After the animal  
300 was fixed in an animal holder, anesthesia was maintained using intravenous dexmedetomidine (4.5  
301  $\mu\text{g}/\text{kg}/\text{hr}$ ) and 0.6 % isoflurane via a calibrated vaporizer with a mixture of air 0.75 L/min and O<sub>2</sub> 0.1  
302 L/min. Rectal temperature (1030, SA Instruments Inc., NY, USA) and peripheral oxygen saturation  
303 and heart rate (7500FO, NONIN Medical Inc., MN, USA) were monitored throughout experiments.  
304 For diffusion imaging the level of isoflurane was increased to 1.0 % to reduce potential eye and head  
305 motion artefacts.

306

#### 307 *Data analysis*

308 Data analysis utilized a version of the HCP pipelines with some customized specifically for use with  
309 non-human primates including structural (PreFreeSurfer, FreeSurferNHP (instead of FreeSurfer) and  
310 PostFreeSurfer), functional (fMRIVolume, fMRISurface) and diffusion preprocessing  
311 (DiffusionPreprocessing) (Donahue et al., 2016; Glasser et al., 2013). These NHPHCP pipelines  
312 requires FMRB's Software Library (FSL) v6.0.1, FreeSurfer v5.3.0-HCP and Connectome Workbench  
313 v1.3.2 (<https://www.humanconnectome.org/software/get-connectome-workbench>) and are  
314 available at <https://github.com/Washington-University/NHPPipelines>.

315

#### 316 *Structural Image Processing*

317 Preprocessing began with the PreFreeSurfer pipeline, in which structural T1w and T2w images were  
318 registered into an anterior-posterior commissural (AC-PC) alignment using a rigid body

319 transformation, non-brain structures were removed, T2w and T1w images were aligned using  
320 boundary based registration (Greve and Fischl, 2009), and corrected for signal intensity  
321 inhomogeneity using  $B_1$ - bias field estimate. Next, data was transformed into a standard “Yerkes19”  
322 macaque atlas (Donahue et al., 2018, 2016) by 12-parameter affine and nonlinear volume  
323 registration using FLIRT and FNIRT FSL tools (Jenkinson et al., 2002).

324

325 Then, the FreeSurferNHP pipeline reconstructed the cortical surfaces using FreeSurfer v5.3.0-HCP  
326 (Fischl, 2012). This process included conversion of data in AC-PC space to a ‘fake’ space with 1-mm  
327 isotropic resolution in volume with a matrix of 256 in all directions, intensity correction,  
328 segmentation of the brain into cortex and subcortical structures, reconstruction of the white and  
329 pial surfaces and estimation of cortical folding maps and thickness. The intensity correction was  
330 performed using FMRIB’s Automated Segmentation Tool (FAST) (Zhang et al., 2001) followed by  
331 scaling the whole brain intensity by a species-specific factor (=80). This process significantly  
332 improved white and grey contrast particularly in the anterior temporal lobe as well as white surface  
333 estimation, an effect that may be associated with the so-called ‘anterior temporal lobe problem’ in  
334 pediatric brains, potentially due to less myelination in these white matter areas. We also improved  
335 the subcortical parcellation training dataset for the macaque brain, and trained for 21 subcortical  
336 structures: brainstem plus bilateral accumbens, amygdala, caudate, claustrum (which is not a part of  
337 the default structures for human FreeSurfer), cerebellum, diencephalon, hippocampus, pallidum,  
338 putamen, and thalamus (Fischl et al., 2002). The training dataset for brain mask extraction was also  
339 created. After parcellating the cortical and subcortical structures with these training datasets using  
340 the T1w image, the claustrum was treated as putamen, so that subsequent white surface estimation  
341 accurately estimates the white surface beneath the insular cortex, as shown in the Results. The pial  
342 surface was estimated using the T2w image to help exclude dura and blood vessels, similar to the  
343 HCP pipeline (Glasser et al., 2013). We modified this procedure by applying an optimized value of  
344 maximal cortical thickness (=10mm in ‘fake’ space, 5mm in real space like the FreeSurfer default).  
345 The surface and volume data in ‘fake’ space was transformed back into the native AC-PC space, and  
346 cortical thickness was recalculated in the animals’ real physical space.

347

348 The PostFreeSurfer pipeline transformed anatomical volumes and cortical surfaces into the Yerkes19  
349 standard space, performed surface registration using folding information via MSMSulc (Robinson et  
350 al., 2014, 2018), generated the mid-thickness surface (by averaging the white and pial surfaces),  
351 generated inflated and very inflated surfaces, as well as the myelin map from the T1w/T2w ratio on  
352 the mid-thickness surface. The volume to surface mapping of the T1w/T2w ratio was done using a

353 ‘myelin-style’ mapping (Glasser and Van Essen, 2011), in which a cortical ribbon mask and a metric  
354 of cortical thickness were used, weighting voxels closer to the midthickness surface. Voxel weighting  
355 was done with a gaussian kernel of 2 mm FWHM, corresponding to the mean cortical thickness of  
356 macaque (see below). The surface models and data were resampled to a high-resolution 164k mesh  
357 (per hemisphere), as well as lower resolution meshes (32k and 10k) for processing diffusion and  
358 functional MRI data, respectively.

359

### 360 *Functional Data Processing*

361 Data were motion corrected, corrected for geometric distortions using spin echo field-map  
362 correction with TOPUP (Andersson et al., 2003), registered to the structural images using the single-  
363 band reference image and BBR (Greve and Fischl, 2009), normalized to grand 4D mean (=10000) and  
364 masked (Andersson et al., 2003; Gonzalez-Castillo et al., 2013; Smith et al., 2013). Intensity bias field  
365 correction was not done because the functional data were acquired with the pre-scan normalize  
366 filter on. The cerebral cortical grey matter voxels were mapped to the surface with the partial-  
367 volume weighted ribbon-constrained volume to surface mapping algorithm and voxels having large  
368 deviations from the local neighborhood voxels’ coefficient of variation excluded. Data was minimally  
369 smoothed at 1.25mm FWHM using geodesic Gaussian surface smoothing algorithm with vertex area  
370 correction and resampled according to the folding-based registration (MSMSulc) to a standard mesh  
371 in which the vertex numbers correspond to neuroanatomically matched locations across subjects.  
372 The subcortical grey matter voxels were processed in the volume using 1.25mm FWHM subcortical  
373 parcel-constrained smoothing and resampling. Altogether, these processes transformed the  
374 functional data into a standard set of greyordinates (~10,000 [10k] vertices per hemisphere and  
375 ~22,000 subcortical voxels) using the Connectivity Informatics Technology Initiative (CIFTI) format  
376 (Glasser et al., 2013).

377

378 Structured temporal noise arising from imaging artefacts, motion and physiological noise was  
379 reduced using a NHP version of multiple-run implementation of FMRIB’s ICA-based X-noisefier (FIX)  
380 (“multi-run sICA + FIX”) (Glasser et al., 2018; Griffanti et al., 2017, 2014; Salimi-Khorshidi et al.,  
381 2014). Principal component analysis (PCA) was applied to segregate data into structured and  
382 unstructured sub-spaces and detect the dimensionality of the structured subspace based on  
383 comparison of the data eigenspectrum with a null data eigenspectrum (a Wishart distribution). The  
384 structured subspace was decomposed into statistically independent components using spatial ICA  
385 and the resulting components were manually classified as “signal” or “noise”, based on their spatial  
386 distribution and temporal properties (N=30) (Griffanti et al., 2017, 2014; McKeown et al., 1998). The

387 FIX classifier was then trained on this manual classification and the performance level was  
388 characterized in terms of true positive rate (TPR) and true negative rate (TNR). A total of 186 spatio-  
389 temporal features were extracted including species-specific vein maps in the standard space and  
390 were used for training/classification. The performance of classifier was evaluated by leave-one-out  
391 (LOO) accuracy testing for a range of thresholds. The de-noising procedure included linear trend  
392 removal, aggressively regressing out 24 movement parameters, which included 6 parameters of rigid  
393 transformation, 6 corresponding derivatives and 12 squares of these parameters, and non-  
394 aggressively regressing out the noise components (Griffanti et al., 2014). Finally, unstructured noise  
395 was attenuated using a Wishart filter (Glasser et al., 2016a) prior to dense connectome analyses.

396

397 Information about different categories of fMRI fluctuations were provided by HCP RestingStateStats  
398 (Marcus et al., 2013) adapted for monkey. In brief, RestingStateStats quantifies total fMRI variance  
399 (prior to any preprocessing) into six categories: high-pass filter, motion, artefacts and nuisance  
400 signals (by FIX classification), unstructured noise (by PCA, see above), neural blood oxygenation level  
401 dependent (BOLD) fluctuations (by FIX classification), and FIX-cleaned mean global timeseries. The  
402 fractional contribution of each category was calculated by dividing by the total fMRI variance.

403

#### 404 *Diffusion data processing*

405 Following the HCP pipeline (Sotiropoulos et al., 2013), the diffusion data was normalized for mean  
406 intensity of the b=0 volume, corrected for distortion using a spin-echo field-map (i.e. a pair of b=0  
407 volumes acquired in opposite phase), and for eddy-currents and motion using TOPUP and EDDY  
408 (Andersson et al., 2003; Andersson and Sotiropoulos, 2016). The images were then registered to the  
409 T1w structural image using the undistorted b=0 volume and a 6-DOF boundary-based registration  
410 (Greve and Fischl, 2009), transformed into 0.9 mm structural volume AC-PC space (spline  
411 interpolation), and masked with a brain mask. The diffusion gradient vectors were rotated according  
412 to the rotational information of the rigid transformation matrix from the b=0 to T1w volume. The  
413 quality of the diffusion data was assessed using 'eddyqc' in FSL (Andersson and Sotiropoulos, 2015;  
414 Bastiani et al., 2019). Summary quality metrics consists of SNR calculated for the b=0 images by  
415 average intensity divided by standard deviation of b=0 volumes (n=52), and for each b-value with  
416 diffusion angular CNR, i.e. the ratio between the standard deviation of the signal predicted by eddy  
417 using a Gaussian Process and the standard deviation of the residuals.

418

419 Fiber orientation estimation was performed with a model-based parametric deconvolution approach  
420 to estimate three crossing fibers per voxel using 'bedpostx\_gpu' in FSL (Behrens et al., 2007;

421 Hernández et al., 2013; Hernandez-Fernandez et al., 2018) with a burn in period of 3000 and a  
422 zeppelin deconvolution kernel (Jbabdi et al., 2012; Sotiropoulos et al., 2016). The uncertainty in the  
423 estimated fiber orientations in white matter voxels was compared with the respective uncertainty  
424 obtained when using HCP data, for each of three crossing fibers (orientations sorted based on  
425 identified volume fraction). Probabilistic tractography was performed on the fiber orientation  
426 estimates using FSL's 'probtrackx2\_gpu' algorithm (Hernandez-Fernandez et al., 2018) to generate  
427 dense diffusion connectomes (Donahue et al., 2016). In brief, we used vertices in the white matter  
428 surface and voxels in the subcortical grey matter as a seed of tracking. Streamlines were allowed to  
429 propagate within subcortical regions, but they were terminated on exit (Smith et al., 2012). The pial  
430 surface and a curvature threshold of 90 degrees were used as stopping criteria. The brain mask  
431 calculated in FreeSurfer was used for a waypoint mask through which paths were kept. The step  
432 length was set to 0.23 mm, one fourth of voxel size, and the maximum path length to 200 mm. The  
433 calculated dense connectomes were created by counting the number of streamlines that terminal on  
434 voxels within the seed regions and normalizing by the total number of generated streamlines. These  
435 dense connectomes were parcellated using the M132 cortical areas (Markov et al., 2014) to reduce  
436 gyral bias and the parcellated connectome matrices were fractionally scaled, symmetrized, and  $\log_{10}$ -  
437 transformed (Donahue et al., 2016). The quality of the dMRI data and the success of the tracking  
438 algorithm were evaluated with respect to quantitative retrograde tracer data by correlating  $\log_{10}$ -  
439 transformed tractography with the corresponding  $\log_{10}$ -scaled fraction of labeled neurons in a  
440 source area relative to the total number of label neurons extrinsic to the injected area (Donahue et  
441 al., 2016; Markov et al., 2014). Cortico-cortical pathways that did not exhibit connectivity in the  
442 retrograde tracer were excluded from the analysis.

443

444 Neurite orientation dispersion and density imaging (NODDI) was used to evaluate tissue  
445 microstructure associated with neurite composition (a collective term referring to both dendrites  
446 and axons) (Zhang et al., 2012). Briefly, NODDI models three compartments (intra-cellular, extra-  
447 cellular and CSF) each with different diffusion properties (stick-tensor-ball model), where the  
448 diffusion motion in the intra-cellular compartment is assumed to be restricted to within neurites  
449 (stick), while that in the extra-cellular compartment is assumed to be a combination of Gaussian  
450 anisotropic (tensor) hindered by the presence of neurites, and Gaussian isotropic (ball) in CSF. The  
451 model includes two *a priori* assumed parameters of intrinsic axial diffusivity  $1.1 \mu\text{m}^2/\text{ms}$  optimized  
452 for grey matter in human (Fukutomi et al., 2018), and isotropic diffusivity  $3.0 \mu\text{m}^2/\text{ms}$  (Zhang et al.,  
453 2012), as well as four unknown parameters (intra-cellular volume fraction, concentration parameter  
454 of Watson distribution (K), mean orientation of Watson distribution ( $\mu$ ) and isotropic volume fraction

455 ( $V_{iso}$ ). The estimated parameters of orientation dispersion index (ODI) and neurite density index  
456 (NDI), as well as diffusion tensor parameters of fractional anisotropy (FA) and mean diffusivity (MD),  
457 were mapped onto the cortical surface using an algorithm weighted towards the cortical mid-  
458 thickness (Fukutomi et al., 2018).



459 **Results**

460 *Coil performance*

461 Coil bench tests showed that the unloaded/loaded Q ratio of the individual coil elements were  
462 approximately  $215/75=2.9$ . This relatively low Q-ratio results from the small degree of loading and  
463 small electromagnetic flux due to the small diameter of the coil elements. Decoupling between  
464 adjacent elements was less than -20 dB indicating low mutual inductance between the elements.  
465 This produced noise correlation coefficients averaging 0.084 (interquartile range 0.02 and 0.126)  
466 with a maximum of 0.395 (see correlation matrix Fig. 2A). High noise correlation was largely  
467 constrained to the nearest neighbor elements (see Fig. 1B for element geometry, see also  
468 Supplementary Fig. S1 for coil channel-specific noise correlation maps).

469

470 The inverse g-factor map, a measure of coil element separation, illustrates geometry dependent  
471 signal intensity variation due to parallel image reconstruction used for dMRI (Fig. 2C). A reduction  
472 factor of two yields an average inverse g-ratio slightly larger than unity ( $1/g=1.03 \pm 0.07$ ; values  
473 reported throughout text as mean  $\pm$  s.d. unless otherwise specified), indicating a small noise  
474 cancellation attributable to low element noise correlation and parallel image reconstruction.  
475 However, larger reduction factors (R=3 and 4) yield substantial degradation of signal intensity  
476 depending on geometry (Fig. 2C, D), suggesting that a maximum GRAPPA of 2 is practical for this coil.

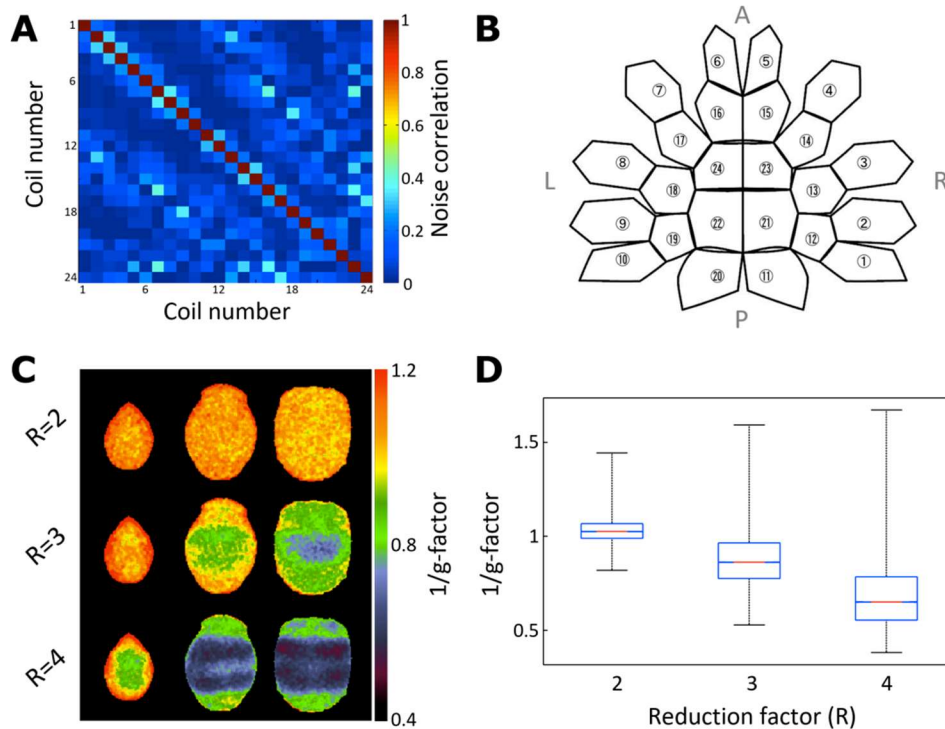

**Figure 2.** Macaque 24-channel coil performance and geometry. **(A)** Noise correlation matrix. **(B)** Coil element arrangement and labeling flattened into a 2D representation. **(C)** Inverse geometry ( $1/g$ )-factor maps using gradient

echo imaging with generalized autocalibrating partially parallel acquisitions (GRAPPA) reduction factors (R=2, 3 and 4) in LR-direction used for diffusion MRI (see later). **(D)** The boxplot shows  $1/g$ -factor with respect to reduction factor. While geometric distortions are small with acceleration factor of 2 ( $1/g=1.03\pm 0.07$ ), further reduction yields large signal degradations. Geometric distortions were evaluated using a phantom whose contour was matched to the average macaque brain.

477

#### 478 *Macaque Data Quality Evaluation*

479 Structural bias-field corrected T1w and T2w weighted images acquired at 500- $\mu$ m resolution are  
480 shown in Fig. 3A and B for an exemplar single subject. Note the good SNR and contrast of the white  
481 matter to grey matter (and to CSF) throughout the brain.

482

483 Flip-angle maps indicate that the transmission was slightly higher in subcortical regions compared to  
484 cortical structures (Fig. 3C), as expected. However, the surface map (Fig. 3D) indicates that the RF  
485 transmission was relatively uniform over the cortical surface ( $86.6^\circ \pm 2.3$ ) (see also Supplementary  
486 Fig. S2A for phantom data). Thus, signal intensity and contrast variations at macaque cortical surface  
487 attributable to RF-transmission inhomogeneity are modest.

488

489  $B_0$  volume (Fig. 3E) and surface (Fig. 3F) maps show inhomogeneities, particularly in and near air  
490 cavities adjacent to the cerebellum and inferior temporal cortex. These inhomogeneities cause signal  
491 intensity loss and spatial distortion in gradient-echo EPI images. Representative tSNR volume (Fig.  
492 3G) and surface (Fig. 3H) maps, acquired with EPI at 1.25 mm isotropic resolution, provide a  
493 quantitative estimate for the data quality. The mean FIX-cleaned tSNR in the macaque brain was  
494  $51.6 \pm 25.6$  overall,  $67.5 \pm 23.7$  in the cortical ribbon and  $37.3 \pm 14.1$  in subcortical regions. These  
495 macaque tSNR values are higher than the HCP data: the FIX-cleaned tSNR in an exemplar HCP  
496 subject was  $38.1 \pm 15.1$  in the whole brain,  $43.0 \pm 15.2$  in the cortical ribbon, and  $30.7 \pm 10.8$  in  
497 subcortical regions (Supplementary Fig. S3 and Table S1). However, a relatively low cortical tSNR in  
498 lateral occipito-temporal cortex was notable in macaque data (Fig. 3H), which is mainly attributable  
499 to a large  $B_0$  dephasing effect (Fig. 3F).

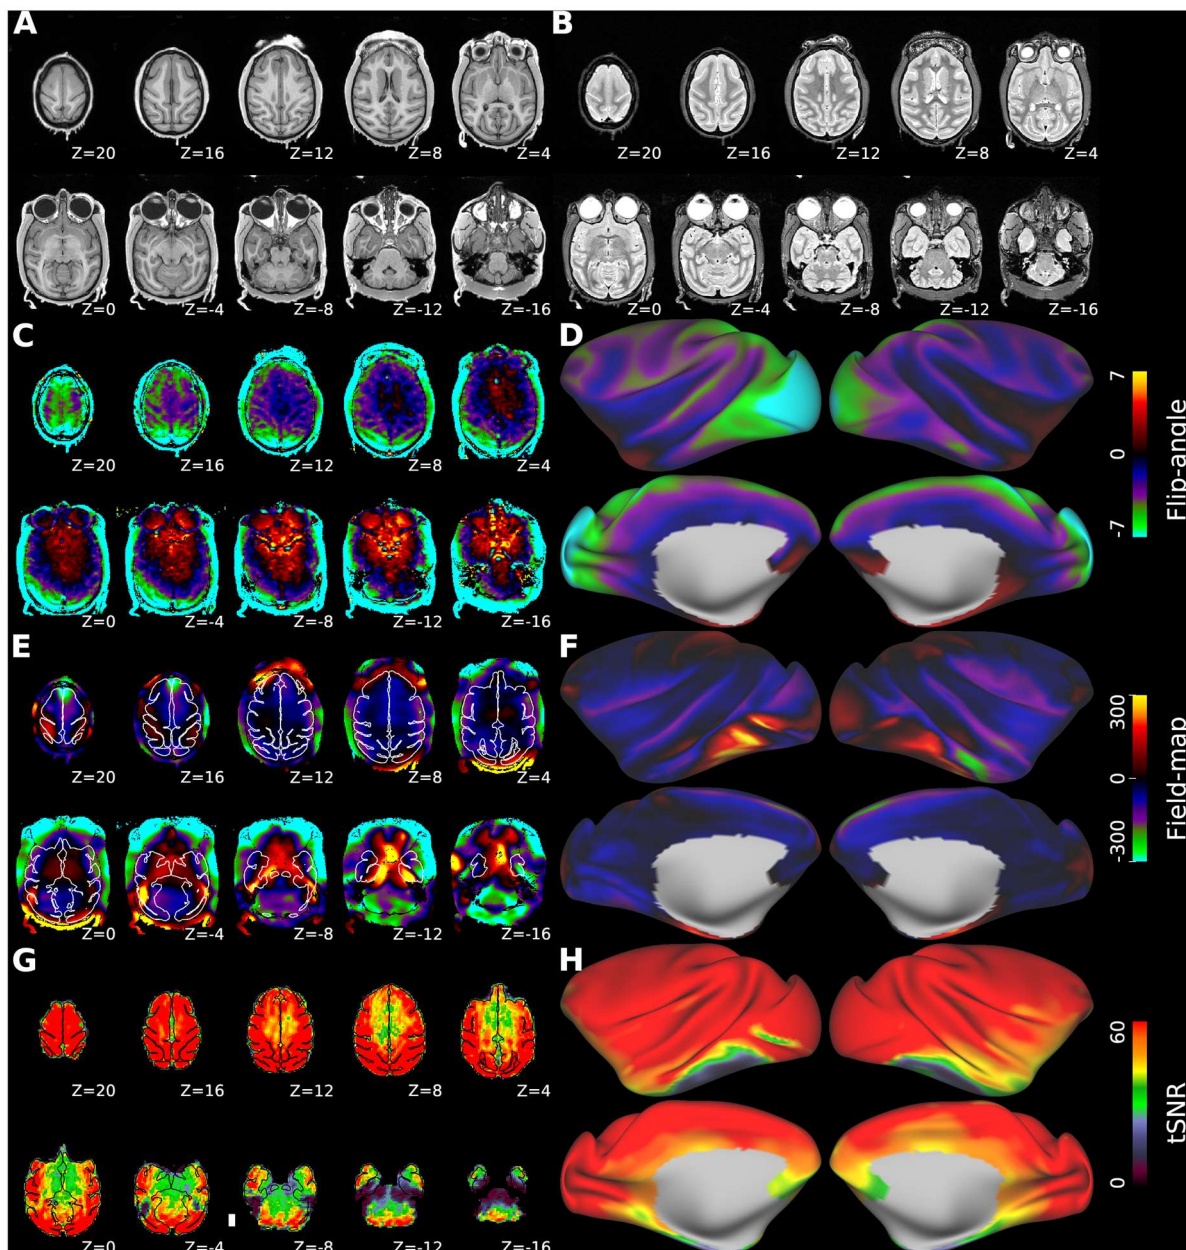

**Figure 3.** Data quality assessment of structural and functional MRI. Axial slices acquired with 500  $\mu\text{m}$  isotropic resolution **(A)** T1-weighted MPRAGE and **(B)** T2-weighted SPAGE. Flip-angle **(C)** axial and **(D)** surface maps. The values indicate the difference between experimental and nominal flip-angle ( $90^\circ$ ) in units of degree.  $B_0$  **(E)** axial and **(F)** surface field-maps. Unit radian per second. White and black lines (in E and G, respectively) outline the pial surface. Temporal signal-to-noise ratio (tSNR) **(G)** axial and **(H)** surface maps of FIX-cleaned fMRI. The tSNR map was acquired using multiband 2D-EPI sequence (TR=0.755s, TE=30ms, MBF=5, isotropic resolution=1.25mm). Data at <https://balsa.wustl.edu/Z44X3>

500

501

502 *Single-Subject Cortical Architecture in Three Macaque Species*

503 FreeSurfer automated segmentation of cortical and subcortical structures using our NHPHCP

504 structural pipeline was reliable across the subjects (Supplementary Fig. S4B), and benefited from

505 additional signal intensity normalization (Supplementary Fig. S4A, see also Supplementary Fig. S2A

506 and S2B for  $B_1$ -transmit and receive fields, respectively). Inspection of pial and white matter surface

507 contours indicates that the automatic segmentation generally followed the contrast boundaries of

508 the T1w image (Supplementary Fig. S4C) and the T2w image (Supplementary Fig. S4D) appropriately,  
509 including in challenging thin heavily myelinated regions such as early visual and somatosensory  
510 cortex. The subcortical structures including claustrum, pallidum, putamen, were automatically and  
511 accurately segmented by the improved subcortical atlas (Supplementary Fig. S4B). The newly added  
512 intensity normalization improved the problematic estimation of the white matter surface in the  
513 anterior temporal lobe (Supplementary Fig. S5A right), which was not achieved using the default  
514 intensity bias field correction (Supplementary Fig. S5A left). The claustrum parcellation strategy also  
515 improved the white matter surface just beneath the insular cortex (Supplementary Fig. S5B, right),  
516 which often resulted in ‘claustrum invagination’ of the white surface by the default FreeSurfer  
517 (Supplementary Fig. S5B left). The claustrum parcellation also improved myelin contrast in the  
518 anterior insular area (see next paragraph).

519

520 Fig. 4 shows representative cortical surface mapping for three macaque species: Japanese rhesus  
521 monkey (*M. fuscata*), rhesus monkey (*M. mulatta*) and crab-eating monkey (*M. fascicularis*), as well  
522 as for average of three species (N=12, consisting of N=4 for each species). Although the brain size  
523 and surface area were different across species and individuals, we successfully achieved cortical and  
524 subcortical parcellation by applying the same Gaussian Classifier Atlas (GCA) and obtained the  
525 surface estimation on gyral and sulcal formations (Fig. 4A-H), myelin contrast (Fig. 4I-L), which were  
526 comparable across species. The total cortical surface area per hemisphere (excluding the non-  
527 cortical ‘medial wall’) ranged from 8,093 to 12,897 mm<sup>2</sup> with an average of 10,052 ± 1,584 mm<sup>2</sup>  
528 (number of hemispheres=24). The average myelin map (Fig. 4L) showed relatively high values in  
529 primary visual, sensorimotor and auditory regions and in the “MT+” complex, whereas association  
530 areas show relatively low values. These results for myelin maps are in good agreement with each  
531 other and with published group average macaque maps (Donahue et al., 2018; Glasser et al., 2014;  
532 Glasser and Van Essen, 2011). However, the myelin level in anterior insular cortex tended to be low  
533 relative to these earlier maps (Glasser et al., 2014); we consider the present maps likely to be more  
534 accurate since this region of agranular insular cortex is very lightly myelinated (Mesulam and  
535 Mufson, 1982). Our maps likely benefitted from improved segmentation between claustrum and  
536 insular cortex, as described above.

537

538 Cortical thickness maps were reasonably consistent across three macaque species (Fig. 4M-P). Most  
539 of frontal, anterior insular and temporal cortices are relatively thick, whereas most of visual and  
540 parietal cortices are relatively thin. Histograms indicate the distribution of cortical thickness (Fig. 4Q-  
541 T). Average cortical thickness across species was 2.1 ± 0.54 (median 2.0, N=12). The (lower) fifth



542 percentile of the cortical thickness, evaluated from species average, was 1.38 mm. These estimates  
543 indicate that utilizing rfMRI isotropic resolution of 1.25 mm ( $\approx 2 \text{ mm}^3$ ) can capture voxels mainly  
544 within the cortical sheet, with modest partial volume effects.  
545

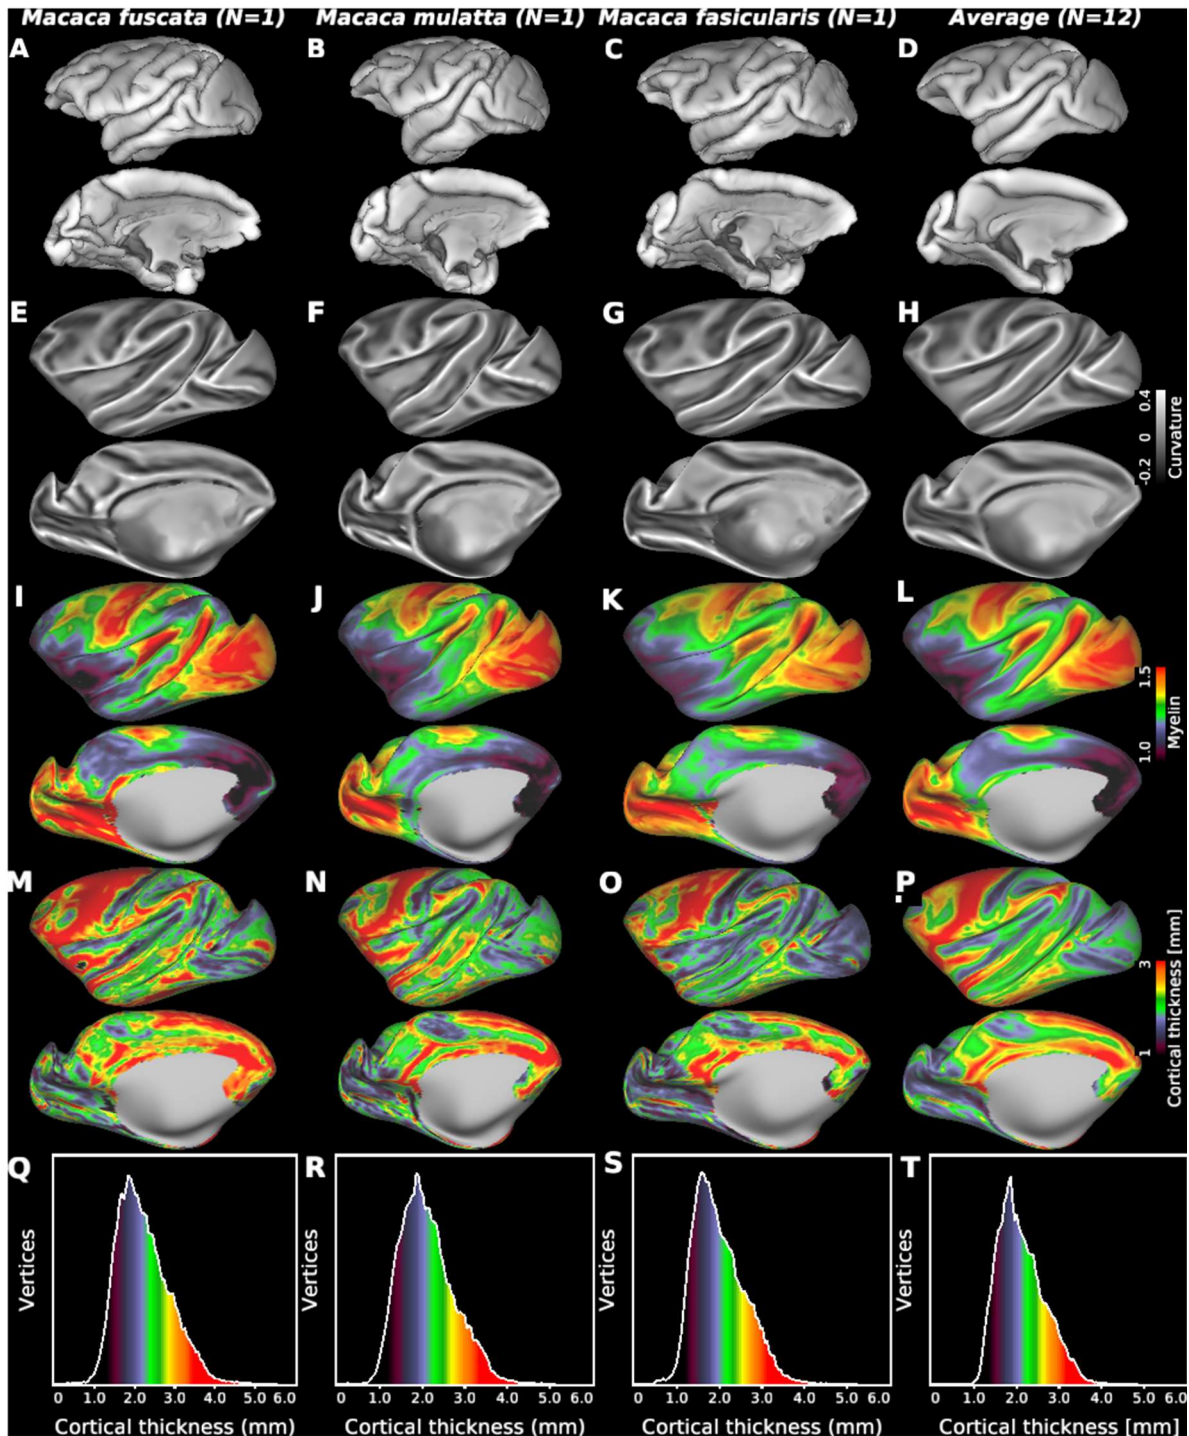

**Figure 4.** Cortical surface mapping of three widely studied macaque monkeys. Japanese rhesus (*Macaca fuscata*, N=1), rhesus (*Macaca mulatta*, N=1), and crab-eating monkey (*Macaca fascicularis*, N=1) and average maps across the species (N=12; N=4 for each species). (A, B, C, D) Pial surface. (E, F, G, H) Curvature and (I, J, K, L) bias-corrected myelin maps

shown on very inflated cortical surface. Cortical thickness (**M, N, O, P**) maps and (**Q, R, S, T**) histograms. Data at <https://balsa.wustl.edu/VjjZV>

546

547 *Data quality of resting-state fMRI*

548

549 To estimate the optimum multiband factor in fMRI, we determined the relationship between tSNR x  
550  $\sqrt{\text{timepoints}}$  and multiband acceleration factor (Fig. 5A) and found that tSNR x  $\sqrt{\text{timepoints}}$   
551 increases up to a factor of 5, then decreases. This pattern was more evident after the data was  
552 processed using ICA-based artefact removal algorithm FIX, which yielded approximately 25%  
553 improvement in tSNR. In the cortical ribbon, denoised tSNR x  $\sqrt{\text{timepoints}}$  is clearly highest at  
554 MBF=5 (Fig. 5B).

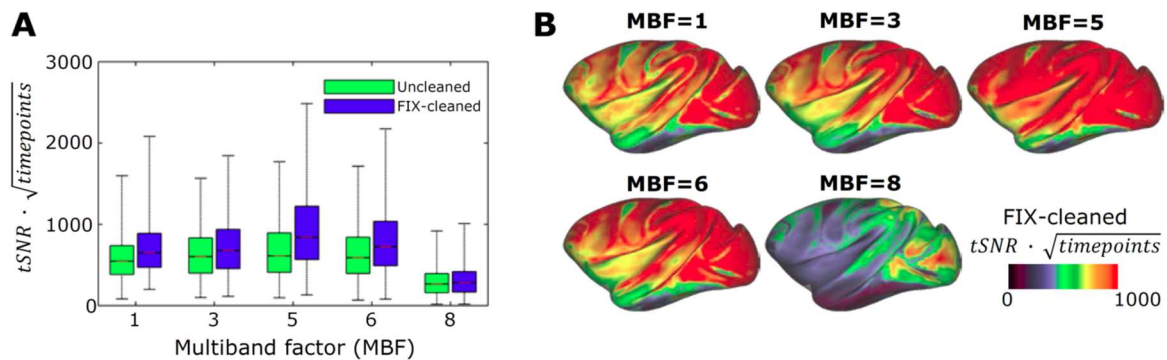

**Figure 5.** Optimization of fMRI multiband acceleration. **(A)** Relationship between temporal signal-to-noise ratio (tSNR) multiplied by a square-root of acquired time-points and multiband factor (MBF). Acquisition times are matched in the data points (each scan 10 minutes, N=1). The boxplot shows distributions of tSNR in the greyordinates (a total of 26k) for FIX-uncleaned (green) and FIX-cleaned data (blue). **(B)** Cortical surface presentation of FIX cleaned tSNR x  $\sqrt{\text{timepoints}}$  vs multiband factor. Note that MBF=5 produces the highest tSNR.

555

556 The resting-state fMRI runs were analyzed using multi-run sICA + FIX. The resulting sICA components  
557 (a total of number of components:  $124 \pm 29$  for each animal, N=30) were manually classified as noise  
558 (on average  $100 \pm 23$  components per animal) or signal ( $24 \pm 9$  components per animal). The manual  
559 classification worked well to train FIX, and the classification accuracy achieved reasonably high  
560 performance (Table 1). The LOO accuracy testing showed that mean TPR and TNR ranged between  
561 96.9-99.9% and 95.1-99.6%, respectively, depending on the choice of threshold. A threshold of 20 was  
562 used for classification, which resulted in mean TPR and TNR of 99.0% and 98.8%.

563

564 **Table 1.** FIX classification accuracy tested by leave-one-out (LOO) in thirty anesthetized macaque  
565 data. Abbreviations: TPR=true positive rate of signal components and TNR=true negative rate of true  
566 artefact components.

| FIX threshold | 1    | 2    | 5    | 10   | 20   | 30   | 40   | 50   |
|---------------|------|------|------|------|------|------|------|------|
| TPR (mean)    | 99.9 | 99.9 | 99.7 | 99.6 | 99.0 | 98.3 | 97.4 | 96.9 |
| TNR (mean)    | 95.1 | 96.1 | 97.4 | 98.2 | 98.8 | 99.0 | 99.3 | 99.6 |
| TPR (median)  | 100  | 100  | 100  | 100  | 100  | 100  | 100  | 100  |
| TNR (median)  | 96.1 | 96.4 | 97.8 | 98.6 | 98.9 | 99.1 | 99.6 | 100  |

567

568 Using RestingStateStats in HCP Pipeline (Glasser et al., 2018; Marcus et al., 2013), the variance in  
 569 macaque resting-state fMRI runs was divided into six categories. Fig. 6 shows their relative  
 570 contributions to the total signal variance ( $38,400 \pm 13,000$ ,  $N=20$ , see also Table S2). Relative  
 571 variance estimations in descending order were unstructured noise ( $70.0 \pm 4.8\%$ ), high-pass filtered  
 572 noise ( $15.3 \pm 4.5\%$ ), structured noise (i.e. artefacts and nuisance signals,  $6.0 \pm 1.5\%$ ), (neural) BOLD  
 573 fluctuations ( $4.1 \pm 2.3\%$ ), motion ( $2.9 \pm 1.3\%$ ), and FIX-cleaned global signal timeseries ( $1.0 \pm 0.7\%$ ).  
 574 In comparison to HCP, unstructured noise accounted for a slightly larger portion in macaque (Fig. 6),  
 575 which mainly originates from subcortical structures (see Supplementary Fig. S6 for spatial  
 576 distribution of the variance categories). Furthermore, the relative BOLD contribution was smaller in  
 577 macaque (4.1%) in comparison to HCP ( $7.7 \pm 2.6\%$ ). Taken together, the contrast-to-noise ratio  
 578 (CNR), defined as ratio between BOLD and unstructured signal, was smaller in macaque ( $0.21 \pm 0.07$ )  
 579 than in HCP ( $0.37 \pm 0.08$ ), which may be due to reduced BOLD signals in the anesthetized state (see  
 580 section Resting-state fMRI in Discussion).

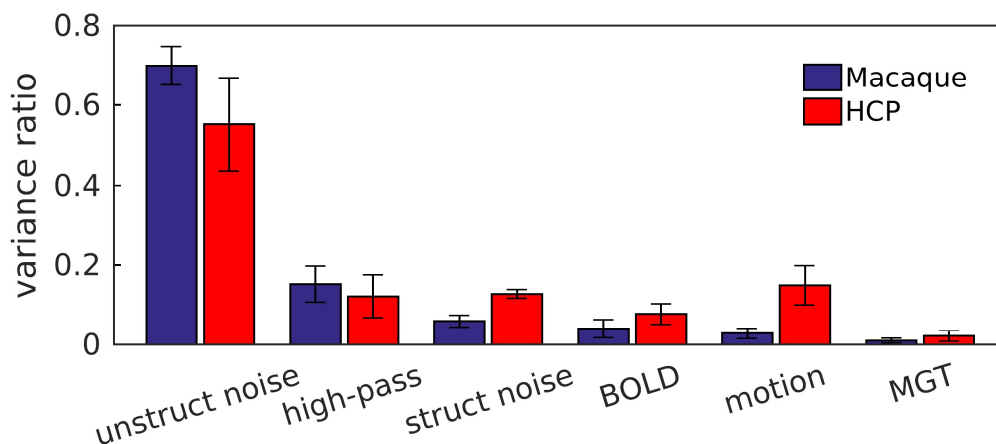

**Figure 6.** Classification of resting-state fMRI variance and their relative contributions of the total variance in macaque ( $N=20$ ) and the human connectome project (HCP,  $N=20$ ). The variances were computed using a development version of the Resting State Stats HCP pipeline. Abbreviations: struct noise=structured noise (scanner artefacts and nuisance signals etc.), BOLD='neural' blood oxygen level dependent signal, MGT=FIX-cleaned mean greyordinate timeseries.

581

582 One useful way to inspect the data quality is to visualize global (and semiglobal) artefacts in a 2-  
 583 dimensional heatmap with time on x-axis and parcel (M132) timeseries on y-axis (i.e. greypplot)



584 (Glasser et al., 2018; Power, 2016; Power et al., 2014). Comparison of a representative greyplot prior  
585 to any preprocessing (Supplementary Fig. S7A) and after preprocessing (Supplementary Fig. S7B)  
586 demonstrated that preprocessing reduced structured artefacts. The mean global timeseries (MGT)  
587 also demonstrate that FIX reduced the global signal variance, which in humans is primarily related to  
588 respiration after movement artefacts have been removed by sICA+FIX. MGT power spectrum  
589 (Supplementary Fig. S7C) revealed distinct peaks within the ventilation frequency range (0.25 to 0.30  
590 Hz). Preprocessing effectively attenuated ventilation artefacts, but only partially attenuated the low  
591 frequency, more likely neural, fluctuations (<0.1 Hz). Across subjects, the MGT variance was  $2,230 \pm$   
592  $1,530$  prior to preprocessing and  $170 \pm 110$  after preprocessing (Supplementary Fig. S7D, N=20).  
593 There appears to be relatively less global physiological noise in the macaque data relative to the  
594 human data (Glasser et al., 2018; Power, 2016), perhaps because the animals' respiration was  
595 externally controlled by the respirator.

596

597 Figure 7 shows a representative resting-state network (RSN) component and seed-based  
598 connectivity obtained in a single monkey. Data was from two 51-min fMRI scans, preprocessed for  
599 correction of motion, distortion, inhomogeneity, and denoising with multi-run FIX as described  
600 earlier. The dense timeseries was further reduced in random noise using Wishart filtering (Glasser et  
601 al., 2016a) and was used for seed-based dense connectivity by computing the full correlation. The  
602 example RSN component (Fig. 7A) extended positive connectivity over posterior parietal cortex  
603 (areas 7A, DP, LIP), precuneus (areas 23, 31), temporo-occipital areas (MST, PGa) and prefrontal  
604 cortex (areas 46d, 8b). Temporal properties of this component included low frequency fluctuations,  
605 less than 0.2 Hz, which are typical of RSNs. A similar functional connectivity pattern was found using  
606 a single greyordinate seed placed over the area 7A (Fig. 7B). Both the RSN signal components (a total  
607 of 32 signals) and the dense functional connectome can be interactively viewed in Connectome  
608 Workbench after downloading data from the BALSAs database (<https://balsa.wustl.edu/3ggwG>).  
609 Overall, these results demonstrate that our experimental setup enables robust functional  
610 connectivity detection and analysis.

611

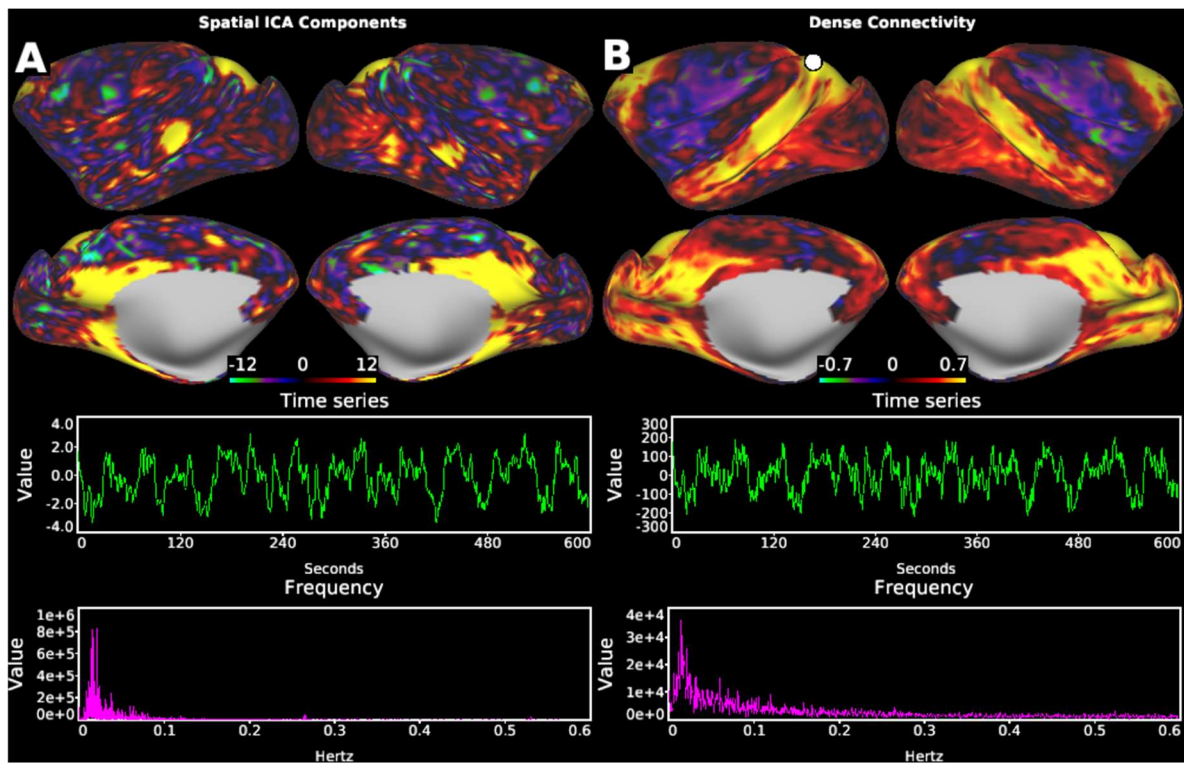

**Figure 7.** Representative macaque resting-state functional connectivity in a single subject. **(A)** An example resting-state network (RSN) obtained in spatial ICA, which shows positive connectivity over posterior parietal cortex (areas 7A, DP, LIP), precuneus (areas 23, 31), temporo-occipital areas (MST, PGa) and prefrontal cortex (areas 46d, 8b, as defined in M132 atlas). Timeseries and frequency of this component (lower panels) exhibited pronounced low-frequency oscillations. **(B)** Exemplar functional connectivity seeded from a single greyordinate in the area 7A (white circle). Spatial distribution of connectivity resembled to that of the component in (A), as well as timeseries and frequency of the seed signal (lower panels). Data was from two 51-min fMRI scans (subject N=1), preprocessed for correction of motion, distortion, inhomogeneity, and denoising with multi-run FIX. The dense timeseries was further reduced in random noise by Wishart filter and used for seed-based dense connectivity (Pearson's correlation). Other components classified into signal or noise, and dense connectivity seeded from other vertices can be interactively viewed using Workbench using data at <https://balsa.wustl.edu/3ggwG>

612

### 613 *Diffusion MRI*

614 Following the HCP paradigm, we used reversed left-right phase-encoding directions in dMRI  
615 acquisition to reduce TE, TR and distortion and to increase SNR and angular CNR. An example of  
616 image distortion and correction (axial and coronal views) is shown in Supplementary Fig. S8. Image  
617 distortions are large near regions with large  $B_0$  inhomogeneity (i.e. temporal lobe, see Fig. 3E, F).  
618 Nonetheless, distortion correction was accurate, albeit with some signal drop-out and degraded SNR  
619 in these regions. Mean motion absolute displacement during 30-min acquisition was  $0.36 \pm 0.07$  mm  
620 (N=10), ensuring little interaction between head motion, eddy-currents and changes in static  
621 magnetic field. In contrast to HCP at 3T (Uğurbil et al., 2013), we used simultaneous MB and GRAPPA  
622 acceleration to reduce distortions. Inspection of temporal stability of the dMRI acquisition did not

623 reveal pronounced structural artefacts around the ventricles and basal slices (Supplementary Fig.  
624 S9), thus indicating that simultaneous MB and GRAPPA accelerations did not substantially interact  
625 with physiological noise (Uğurbil et al., 2013). The dMRI quality assurance measures were similar  
626 between this study and the HCP (Fig. 8). Average SNR (whole brain) was  $11.6 \pm 1.4$  in macaque  
627 (N=10) and  $9.4 \pm 0.9$  in the HCP (N=10) (Fig. 8A). Exemplar subject data are compared in  
628 Supplementary Fig. S10 and Supplementary Table S3. The CNR slightly increased towards higher b-  
629 values and was similar across the studies (Fig. 8B). In white matter, three crossing fibers voxels  
630 (selected by thresholding at 0.05 of third fiber's volume fraction) were detected in  $59\% \pm 7\%$  and  
631  $57\% \pm 4\%$  of voxels in macaque and the HCP, respectively (Fig 9D). Finally, the dispersion  
632 uncertainties of 1<sup>st</sup>, 2<sup>nd</sup> and 3<sup>rd</sup> fiber orientations these voxels exhibited were also similar across the  
633 studies (Fig 9E).  
634

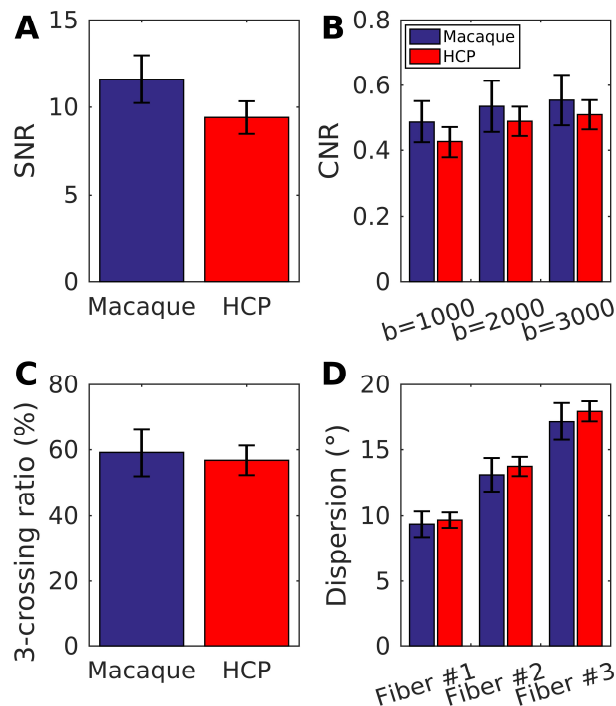

**Figure 8.** Comparison of dMRI quality measures between macaque and the HCP (blue and red bars, respectively; N=10). Plots show whole brain SNR (A) and CNR across b-values 1000, 2000 and 3000 (B), as well as three-crossing fiber ratio (C) and dispersion uncertainties (in degree) of 1<sup>st</sup>, 2<sup>nd</sup> and 3<sup>rd</sup> fiber orientations in the white matter voxels (D). Overall, the quality measures were comparable across the studies.

635

636 Figure 9 shows M132 parcellated cortical maps of MD (Fig. 9A), FA (Fig. 9B), NDI (Fig. 9C) and ODI  
637 (Fig. 9D) (N=6). The MD is low in the primary motor (F1) and premotor cortices (such as F2, F4, F5),  
638 and primary sensory cortices including somatosensory (areas 3, 1, 2), visual (V1) and auditory  
639 cortices including core, as well as intraparietal sulcus area (Fig. 9A), whereas the NDI is high in all of

640 these areas. MD and NDI were strongly anti-correlated ( $R=-0.75$ ,  $p<0.001$ ). The ODI was high in the  
641 periphery of the V1, somatosensory area 1, auditory cortices including core (Fig. 9D) and  
642 intermediate in MT and other higher visual areas. The FA was higher in the frontal and anterior  
643 temporal cortices and strongly anti-correlated with ODI ( $R=-0.86$ ,  $p<0.001$ ). These results are  
644 comparable with those observed in the HCP (Fukutomi et al., 2018). The structural connectivity  
645 patterns extracted from diffusion tractography (DT) were also parcellated and explored with respect  
646 to the published quantitative retrograde tracer data (Fig. 9E, F) (Markov et al., 2014). Comparison  
647 between parcellated DT (pDT) seed from area L-F5 and tracer data seeded from area F5 showed a  
648 relatively good correlation ( $R=0.70$ ,  $p<0.001$ , for non-zero tracer connections:  $N=72$ ). However,  
649 fidelity of pDT decreased for weak long-distance connections (e.g. false positive connection to MT  
650 and MST and false negative connections to V2, V3, TEpd and TEpv), as reported previously (Donahue  
651 et al., 2016).  
652

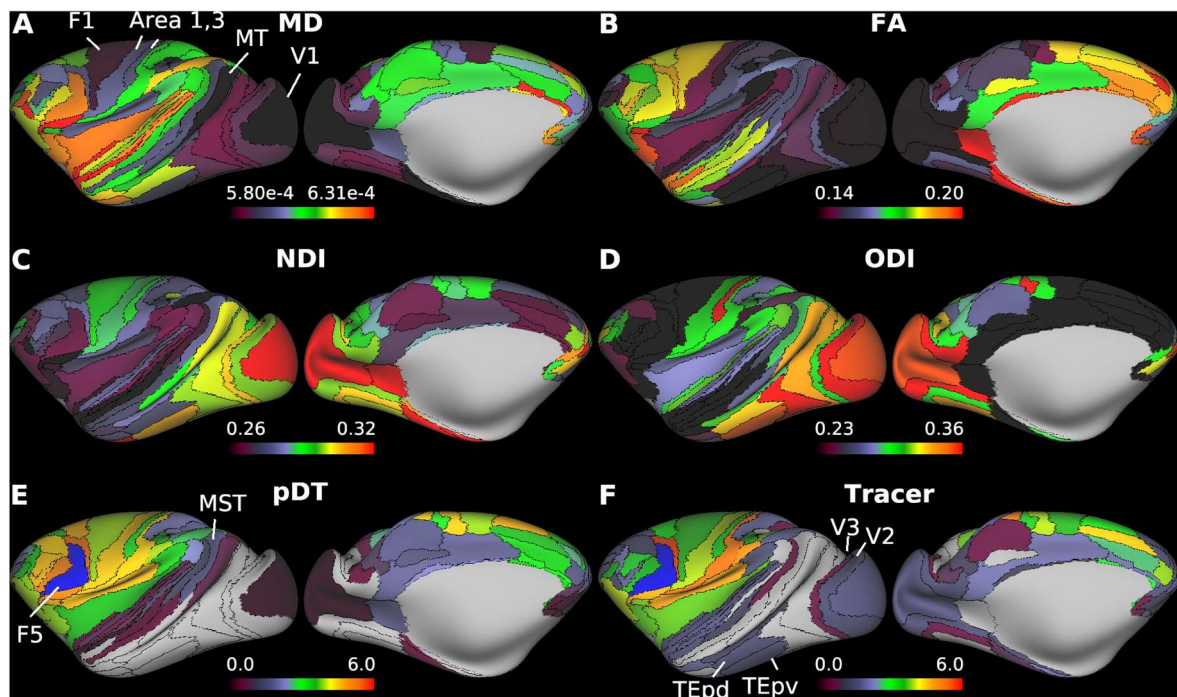

**Figure 9.** Representative diffusion magnetic resonance imaging (dMRI) applications. Parcellated cortical surface distributions of mean diffusivity (MD) (A) and fractional anisotropy (FA) (B) calculated in diffusion tensor model, and neurite density index (NDI) and (C) orientation dispersion index (ODI) (D) calculated in NODDI (see main text;  $N=6$ ). (E) Parcellated diffusion tractography ( $N=1$ , ID=A18031601) seed from left premotor area, F5 (blue color) and (F) the quantitative ground-truth derived from retrograde tracer injected into F5. Note the correspondence between tractography and tracer connectivities (see main text for details). Data at <https://balsa.wustl.edu/zppXg>

653

654

655 **Discussion**

656 Here, we have presented an adaptation of the HCP's approach to multimodal MRI acquisition,  
657 preprocessing, and analysis to the macaque, using the combination of a custom-made 24-channel  
658 receive-coil, high-resolution parallel imaging, and the HCP-NHP preprocessing and analysis pipelines.  
659 This approach yields robust estimates of cortical thickness, myelin content, and functional and  
660 diffusion measures. Importantly, since the presented protocols used share similar strengths to the  
661 HCP image acquisition, and the data is stored in a common geometrical framework system ('CIFTI  
662 greyordinates'), we anticipate that it will facilitate direct multi-modal comparisons with an  
663 unprecedented accuracy between macaque and human connectomes. To enable other groups to do  
664 HCP-Style analyses in the macaque, this 24-channel macaque coil is available (via Rogue Research;  
665 production: Takashima Seisakusho Co. Ltd., Tokyo, Japan) and the data acquisition protocols are  
666 freely available from our website ([www.nitrc.org/TBA](http://www.nitrc.org/TBA)), enabling other investigators to adapt,  
667 compare and make the best use of the parallel imaging capabilities of the coil. The HCP-NHP analysis  
668 pipelines are also available on github along with the HCP-Style macaque specific FIX training files  
669 (<https://github.com/Washington-University/NHPPipelines>).

670

671 *Coil Design*

672 Our multichannel receive coil, fabricated to closely fit a large macaque head (Fig. 1A) will allow  
673 routine imaging of macaque monkeys of different species with a range of lateral muscles and head  
674 sizes. The close proximity of the coil to the head allows high SNR in the brain with further SNR gains  
675 in the cortex produced by the small size of the elements (Fig. 1) (Janssens et al., 2013; Wiggins et al.,  
676 2006). This design allowed acquisition of both T1w and T2w structural whole-brain image acquisition  
677 with a 0.5mm isotropic resolution in 22 minutes (Fig. 3a, b). In conjunction with homogeneous RF  
678 transmission (Fig. 3C, D), these two features enabled automatic and robust subcortical  
679 segmentations and reconstructions of pial and white matter surfaces (Supplementary Fig. S4).

680

681 Twenty-four receive elements were arranged so as to optimize efficiency of spatial encoding capability  
682 in the axial slice direction (Fig. 1B, D). This geometrical arrangement yields a relatively small noise  
683 correlation coefficient (0.084), which is smaller than in previous macaque multi-channel coil designs  
684 such as 0.12 in a 24-channel (Gilbert et al., 2016) and 0.22 in a 22-channel (Janssens et al., 2013). Our  
685 coil design together with slice and in-plane accelerated imaging allowed up to five-fold and two-by-  
686 two (MB-by-GRAPPA) accelerations for fMRI and dMRI, respectively. Moreover, this substantially  
687 improved the imaging data quality through increased efficiency in accumulation of data volumes  
688 (rfMRI: over 8000 volumes; and dMRI: 500 diffusion directions, all acquired in a single session in a



689 period of 140 minutes). Taken together, our 24-channel coil highlights the benefit of accelerated  
690 imaging achieved through the geometrical arrangement and low noise correlation of the coil elements.

691

### 692 *Resting-state fMRI*

693 To accurately map BOLD signals onto the cortical sheet, the image resolution (1.25 mm isotropic)  
694 was matched with 5<sup>th</sup> percentile of cortical thickness (Fig. 4N, O, P) to reduce the partial volume  
695 effects from white matter and CSF signals (Glasser et al., 2013), following the HCP data acquisition  
696 strategy at 3T (resolution 2 mm, the 5<sup>th</sup> percentile of human cortical thickness (Glasser et al., 2013)).  
697 The reduction from an isotropic volume of 2 mm to 1.25 mm, however, incurs a 4-fold SNR penalty.  
698 Nonetheless, tSNR of fMRI in macaque (Fig. 3G, H) is superior to that in the HCP acquired with  
699 comparable imaging parameters (Supplementary Fig. S3, Table S1). This tSNR gain may be primarily  
700 attributed to the close proximity to the animal and small diameter of the receive coil elements, with  
701 an additional gain from relatively small bandwidth. This illustrates the power of parallel imaging to  
702 overcome a physical size difference of a factor of twelve (macaque and human brain volumes are  
703 approximately 100 cm<sup>3</sup> and 1200 cm<sup>3</sup>, respectively).

704

705 While informative, tSNR is not an explicit measure of fMRI sensitivity to blood flow changes induced  
706 by neural activity. It is well known that variation of fMRI signal is a mixture of nuisance (e.g. motion  
707 and respiration) and neural BOLD components. To obtain insight into the content of our fMRI signals,  
708 we categorized different signal sources and found that neural BOLD signal explains approximately  
709 4.1% of the total fMRI variance (in data grand mean scaled to 10,000; corresponding to  $773 \pm 438$  in  
710 absolute variance) in anesthetized macaque resting-state (Fig. 6). In HCP fMRI data (awake-state),  
711 neural BOLD signal explains approximately 7.7% of total variance (corresponding to  $4158 \pm 1594$  in  
712 absolute variance (Glasser et al., 2018; Marcus et al., 2013)). Because the image acquisition  
713 protocols and image qualities are similar across the studies (Supplementary Fig. S3), we speculate  
714 that the lower BOLD neural signal in our macaque data may be due to, 1) attenuated thalamo-  
715 cortical and cortico-cortical synchronization in the anesthetized state, and/or 2) a ceiling effect of  
716 signals due to relatively high blood flow, oxygen extraction rate, and saturation in anesthetized  
717 macaque brain (Kudomi et al., 2005). This issue may be overcome with widely used contrast agents  
718 (i.e. MION) and cerebral blood volume weighted fMRI (Mandeville et al., 1998) to boost CNR.  
719 Nonetheless, the relatively small contribution of neural BOLD signal to the total variance highlights  
720 the critical importance of post-processing to clean up nuisance signals to obtain functional  
721 connectivity estimates that are neurobiologically meaningful. ICA-based FIX denoising has been  
722 established to be very successful at removing non-random time-varying spatially specific artefacts

723 (e.g. movement, vascular and cerebrospinal fluid pulsation or scanning artefacts) in the human  
724 resting-state fMRI (Griffanti et al., 2017, 2014; Salimi-Khorshidi et al., 2014; Smith et al., 2013). Here,  
725 we demonstrated that FIX is also very successful reducing such artefacts (6.0% of total variance, Fig.  
726 6) with over 98% classification accuracy (threshold at 20, Table 1) in the macaque resting-state fMRI.  
727 The relative global mean variance and its reduction in macaque (1.5% before cleanup and 1.0% after  
728 cleanup) is smaller in comparison to the HCP (3.2% before cleanup and 2.2% after cleanup) (Glasser  
729 et al., 2018). This smaller global signal variance in anesthetized macaques can be attributed to more  
730 stable global blood flow because respirations and pCO<sub>2</sub> were regulated by mechanical ventilation  
731 (Birn et al., 2006). The majority of the signal variance, however, is unstructured noise (>60%), in  
732 particular at subcortical regions that are distant from the coil elements (Supplementary Fig. S6),  
733 which can be effectively reduced using parcellation and/or Wishart filtering (Fig. 8B) (Glasser et al.,  
734 2016b).

735

736 The advantages of our experimental methodology was further demonstrated by the capability to  
737 identify an average (across sessions/animals) of  $21 \pm 9$  signal (neural) components at 3T (Fig. 5, for  
738 exemplar signal components see Fig. 5 in BALSAs). A previous report using group-ICA from six  
739 anesthetized macaques at 7T identified 11 RSNs (Hutchison et al., 2011). Our preliminary results  
740 replicate several of these RSNs. Taken together, from the data quality perspective, the 24-channel  
741 coil yields macaque rfMRI data that can be accurately and sensitively mapped onto cortical sheet  
742 and is comparable in quality with the HCP rfMRI data, whereas from the physiology perspective, we  
743 must be cautious when making inferences because of the potential effects of anesthesia on both  
744 neural activity and neurovascular coupling. We will explore this topic in future work on a specialized  
745 coil for awake monkey imaging.

746

747 While scaling the fMRI resolution with respect to the cortical thickness is a minimum requirement to  
748 accurately localize BOLD signal within the cortical sheet, another important factor is the size of  
749 functional imaging voxels relative to the area of the cortical surface for identifying sharp gradient  
750 ridges in FC (Glasser et al., 2016a). We found that macaque cortical grey matter surface area is  
751  $\approx 10,100 \text{ mm}^2$  per hemisphere, which is close to previous estimates of  $11,900 \text{ mm}^2$  (Chaplin et al.,  
752 2013) and  $9,600 \text{ mm}^2$  (Donahue et al., 2018). Given that one cortical hemisphere is expected to  
753 contain 130-140 cortical areas (Van Essen et al., 2011), an average parcel corresponds to an  
754 approximate area of  $70 \text{ mm}^2$  or 70 greyordinates (in our standard 10k greyordinate per hemisphere  
755 space for the macaque with 1.25mm average spacing between greyordinates). In comparison, each  
756 human cortical hemisphere has an approximate area of  $88,200 \text{ mm}^2$ , about is 9-fold larger than in



757 macaque. Since it has 180 cortical areas (Glasser et al., 2016a), an average human cortical parcel  
758 corresponds to an area of 490 mm<sup>2</sup> or ≈160 greyordinates (in the HCP standard 32k greyordinates  
759 per hemisphere space for humans). This suggests that identifying clear gradient ridges in FC can be  
760 more reliably assessed in the HCP in comparison to our macaque setup, which can be attributed to  
761 higher number of greyordinates and 9-fold larger cortical area in humans than in macaques. Viewed  
762 from another perspective, since macaque cortex contains 0.85 billion neurons per hemisphere  
763 (Herculano-Houzel et al., 2007), a single greyordinate (in 10k space) samples about 85,000 neurons  
764 on average. In comparison, since human cortex contain 8.2 billion neurons per hemisphere (Azevedo  
765 et al., 2009), so a single HCP greyordinate (in 32k space) samples an average of 270,000 neurons,  
766 about three-fold greater than in the macaque. Taken together, while the expected number of  
767 greyordinates per cortical area is larger in the human (due to 9-fold larger cortical area of the human  
768 brain), our HCP-style approach for the macaque samples fewer neurons per greyordinate (due to the  
769 4-fold smaller voxel volume).

770

#### 771 *Diffusion MRI*

772 Spatial resolution is among the most important factors for resolving crossing fiber architecture  
773 (Donahue et al., 2016) and microstructural properties such as cortical radial anisotropy (Fan et al.,  
774 2017; Sotiropoulos et al., 2016). The ratio between the voxel size and macaque white matter volume  
775 for the presented dMRI protocol ( $0.73 \text{ mm}^3 / 23.000 \text{ mm}^3 \approx 3 \times 10^{-5}$ ) approximately matches 2.5 mm  
776 isotropic resolution in the human white matter ( $16 \text{ mm}^3 / 500.000 \text{ mm}^3 \approx 3 \times 10^{-5}$ ) but is an order of  
777 magnitude larger than in the HCP ( $1.95 \text{ mm}^3 / 500.000 \text{ mm}^3 \approx 4 \times 10^{-6}$ ), although a more precise  
778 comparison would require investigations on features such as radii of curvature, tract and blade  
779 thickness. Smaller voxel size could aid in distinguishing challenging fiber pathways, however, under  
780 our experimental conditions further reduction was impractical due to gradient power and SNR  
781 limitations.

782

783 To mitigate this limitation, our strategy was to acquire data with exceptionally high angular  
784 resolution (500 directions) capitalizing on two-by-two acceleration (out-of-plane MB and in-plane  
785 GRAPPA) enabled by the multichannel array coil. The effect of this strategy was shown in the  
786 comparable sensitivity to 3<sup>rd</sup> crossing fibers between species (Fig. 8), despite the resolution  
787 limitation in macaque. A recent ex vivo macaque study used high-quality, high-field magnetic field  
788 (4.7T), long data acquisition (≈27 h) postmortem and gadolinium enhanced diffusion scans to  
789 demonstrate a relatively good correspondence between probabilistic tractography and quantitative  
790 retrograde tracer (R=0.55-0.60) (Donahue et al., 2016). Here, we replicated a part of those results

791 (Fig. 8E, F), thus, augmenting the findings of Donahue and colleagues to *in vivo* applications that are  
792 within practical time limitations ( $\approx 30$  min). Taken together, these results suggest that the ‘HCP’-style  
793 dMRI data acquisition protocols are well positioned to produce quantitative tractography measures  
794 that are neuroanatomically meaningful.

795

796 The high spatial resolution with respect to cortical thickness enabled us to carry out cortical surface  
797 mapping of neurite properties and to provide preliminary evidence for nonuniformity in the  
798 composition and distribution of neurites in macaque cerebral cortex (Fig. 9C, D). Neurite properties  
799 are considered important because the density of neurites constitute basic building units (axons and  
800 dendrites) of neuronal networks, while ODI provides an indicator of the heterogeneity of neurite  
801 fiber orientations, a ratio between tangential and radial fibers (Fukutomi et al., 2018). We found that  
802 NDI was highest in V1 and higher than average in other visual representation areas (V2, V3, V4, and  
803 MT), somatosensory (1, 2, 3 and A1), motor (M1) and granular prefrontal (Fig. 9C), cortical  
804 distributions resembled those of myelin contrast (Fig. 4L). ODI was high in early somatosensory,  
805 auditory and visual cortices (Fig. 9D). Together, these results are in good agreement with the HCP  
806 data (Fukutomi et al., 2018).

807

#### 808 *Towards Improved Macaque Connectomes and Cross-species Connectome Comparisons*

809 The construction of a high-quality connectome requires anatomically accurate definitions of parcels  
810 that represent a biologically meaningful partition of brain areas based on their function,  
811 architecture, connectivity, and topography (Felleman and Van Essen, 1991; Glasser et al., 2016a; Van  
812 Essen and Glasser, 2018). Comparison between transitions in multimodal neuroimaging contrasts,  
813 such as MT myelination (Fig. 4C) and functional connectivity (Fig. 8A, E), are particularly suggestive  
814 of brain area boundaries (Glasser et al., 2016a). Therefore, the approach to data collection and  
815 analysis presented here provides macaque data that may aid in multi-modal parcellation of the  
816 macaque and generation of structural and functional connectomes (Glasser et al., 2016b), though a  
817 robust delineation of cortical areas into functionally distinct areas will assuredly require analysis of a  
818 more extensive dataset.

819

820 These HCP-style macaque data also provide an attractive substrate for multi-modal registration  
821 across species—in particular, macaques and humans. Just as myelin maps and resting state networks  
822 are used to register across human subjects (Robinson et al., 2018, 2014), they could be used to  
823 register the cerebral cortex between group averages of humans and macaques. This would allow  
824 direct comparisons between human and macaque structural and functional connectivity (Mars et al.,

825 2018b). That said, we expect that the gains for cross-individual registration with areal features in the  
826 macaque will be less than those in humans simply because folding patterns and the relationships  
827 between folds and areas are less variable in macaques than they are in humans. Additionally, this  
828 approach to macaque imaging acquisition and analysis can be used to form structural and functional  
829 connectomes in the macaque for comparison with invasively measured tracer datasets (Donahue et  
830 al., 2016; Glasser et al., 2016b). Such validation analyses will help to determine the optimal methods  
831 for forming structural and functional connectomes in human studies (Jbabdi et al., 2013), where a  
832 direct comparison with a gold standard is not available. Future work will also explore cross-species  
833 comparisons between macaques and marmosets imaged using specialized hardware and an HCP-  
834 style approach. These acquisition and analysis methods can also be applied to study disease models  
835 in primate species where controlled and invasive methods can be used to investigate causality and  
836 plasticity of structural and functional connectomes and their importance in shaping primate  
837 behavior.

838

### 839 *Conclusions*

840 A 24-channel phased-array coil for 3T was constructed and optimized for in vivo parallel imaging of  
841 macaque monkey brain. The coil provided high SNR whole-brain coverage and allowed parallel  
842 imaging with high speed acquisition by a five-fold and four-fold increase in functional and diffusion  
843 MRI, respectively. The data acquisition strategy in combination with the HCP-NHP minimal  
844 preprocessing pipelines enabled robust mapping of structural and functional properties onto surface  
845 of the cortex. The presented protocols can be acquired within a single imaging session and represent  
846 compelling advance in identifying multi-modal cortical topology and structural and functional  
847 connectomes in the macaque. Overall, this study demonstrates that MRI studies in animals may  
848 benefit from adapting the methodologies introduced by the HCP.

849

### 850 **Notes**

851 Data of figures and supplementary figures are available at <https://balsa.wustl.edu/study/show/LPDP>  
852 Supplementary Information is available in the online version of the paper.

853

### 854 **Acknowledgements**

855 We thank Henry Kennedy for his helpful comments, and Stephen Frey, Nobuyoshi Tanki, Chiho  
856 Takeda, Akihiro Kawasaki, Reiko Kobayashi, Kenji Mitsui and Hanako Hirose for their technical help.  
857 This research is partially supported by the program for Brain/MINDS and Brain/MINDS-beyond from  
858 Japan Agency for Medical Research and development, AMED (JP18dm0207001, JP18dm0307006), by

859 RIKEN Compass to Healthy Life Research Complex Program from Japan Science and Technology  
860 Agency, JST, by MEXT KAKENHI Grant (16H03300, 16H03306, 16H01626, 15K12779 to T.H. and  
861 JP26640065, JP16H06531 to Y.G.), NIH F30 MH097312 (M.F.G.) and RO1 MH-60974 (D.C.V.E.) and by  
862 the National Institutes of Natural Sciences (NINS) program for cross-disciplinary study (2013-2015)  
863 (Y.G.) and by Wellcome Trust (SMS, JS). The author Yoshihiko Kawabata holds financial conflict of  
864 interest because the coil is produced by his company (Takashima Seisakusho Co. Ltd., Tokyo, Japan)  
865 and distributed through his collaboration company (Rogue Research, Montreal, Canada). The other  
866 authors have no conflicts of interest to declare.

867

#### 868 **Author Contributions**

869 T.H., and M.F.G. designed the study.

870 J.A.A, Y.H., M.F.G. and T.H. analyzed data.

871 M.F.G., C.J.D., and T.H. developed new software tools.

872 J.A.A, T. O., M. O. Y. K, Y.U, K.M, K. N., M.Y, A.Y., Y.G. and T.H. performed experiments.

873 J.A.A, M.B., M.F.G, T.S.C, S.J., S.N.S, S.S, D.C.V.E and T.H. wrote the paper.

874

875 **References**

876

877 Andersson, J.L.R., Skare, S., Ashburner, J., 2003. How to correct susceptibility distortions in spin-echo  
878 echo-planar images: application to diffusion tensor imaging. *NeuroImage* 20, 870–888.

879 [https://doi.org/10.1016/S1053-8119\(03\)00336-7](https://doi.org/10.1016/S1053-8119(03)00336-7)

880 Andersson, J.L.R., Sotiropoulos, S.N., 2016. An integrated approach to correction for off-resonance  
881 effects and subject movement in diffusion MR imaging. *NeuroImage* 125, 1063–1078.

882 Andersson, J.L.R., Sotiropoulos, S.N., 2015. Non-parametric representation and prediction of single-  
883 and multi-shell diffusion-weighted MRI data using Gaussian processes. *NeuroImage* 122,  
884 166–176. <https://doi.org/10.1016/j.neuroimage.2015.07.067>

885 Azevedo, F.A.C., Carvalho, L.R.B., Grinberg, L.T., Farfel, J.M., Ferretti, R.E.L., Leite, R.E.P., Filho, W.J.,  
886 Lent, R., Herculano-Houzel, S., 2009. Equal numbers of neuronal and nonneuronal cells make  
887 the human brain an isometrically scaled-up primate brain. *J. Comp. Neurol.* 513, 532–541.  
888 <https://doi.org/10.1002/cne.21974>

889 Bastiani, M., Cottaar, M., Fitzgibbon, S.P., Suri, S., Alfaro-Almagro, F., Sotiropoulos, S.N., Jbabdi, S.,  
890 Andersson, J.L.R., 2019. Automated quality control for within and between studies diffusion  
891 MRI data using a non-parametric framework for movement and distortion correction.  
892 *NeuroImage* 184, 801–812. <https://doi.org/10.1016/j.neuroimage.2018.09.073>

893 Behrens, T.E.J., Berg, H.J., Jbabdi, S., Rushworth, M.F.S., Woolrich, M.W., 2007. Probabilistic diffusion  
894 tractography with multiple fibre orientations: What can we gain? *NeuroImage* 34, 144–155.  
895 <https://doi.org/10.1016/j.neuroimage.2006.09.018>

896 Birn, R.M., Diamond, J.B., Smith, M.A., Bandettini, P.A., 2006. Separating respiratory-variation-  
897 related fluctuations from neuronal-activity-related fluctuations in fMRI. *NeuroImage* 31,  
898 1536–1548. <https://doi.org/10.1016/j.neuroimage.2006.02.048>

899 Brodmann K., 1905. Beitrage zur histologischen localisation der grosshirnrinde. Dritte Mitteilung. Die  
900 Rinden-felder der niederen Affen. *J Psychol Neurol* 177–226.

901 Chaplin, T.A., Yu, H.-H., Soares, J.G.M., Gattass, R., Rosa, M.G.P., 2013. A Conserved Pattern of  
902 Differential Expansion of Cortical Areas in Simian Primates. *J. Neurosci.* 33, 15120–15125.  
903 <https://doi.org/10.1523/JNEUROSCI.2909-13.2013>

904 Coalson, T.S., Van Essen, D.C., Glasser, M., 2018. Lost in Space: The Impact of Traditional  
905 Neuroimaging Methods on the Spatial Localization of Cortical Areas.  
906 <https://doi.org/10.1101/255620>

907 Donahue, C.J., Glasser, M.F., Preuss, T.M., Rilling, J.K., Essen, D.C.V., 2018. Quantitative assessment  
908 of prefrontal cortex in humans relative to nonhuman primates. *Proc. Natl. Acad. Sci.*  
909 201721653. <https://doi.org/10.1073/pnas.1721653115>

910 Donahue, C.J., Sotiropoulos, S.N., Jbabdi, S., Hernandez-Fernandez, M., Behrens, T.E., Dyrby, T.B.,  
911 Coalson, T., Kennedy, H., Knoblauch, K., Essen, D.C.V., Glasser, M.F., 2016. Using Diffusion  
912 Tractography to Predict Cortical Connection Strength and Distance: A Quantitative  
913 Comparison with Tracers in the Monkey. *J. Neurosci.* 36, 6758–6770.  
914 <https://doi.org/10.1523/JNEUROSCI.0493-16.2016>

915 Fan, Q., Nummenmaa, A., Polimeni, J.R., Witzel, T., Huang, S.Y., Wedeen, V.J., Rosen, B.R., Wald, L.L.,  
916 2017. High b-value and high Resolution Integrated Diffusion (HIBRID) imaging. *NeuroImage*  
917 150, 162–176. <https://doi.org/10.1016/j.neuroimage.2017.02.002>

918 Felleman, D.J., Van Essen, D., 1991. Distributed hierarchical processing in the primate cerebral  
919 cortex. *Cereb. Cortex N. Y. N* 1991 1, 1–47. <https://doi.org/10.1093/cercor/1.1.1>

920 Fischl, B., 2012. FreeSurfer. *NeuroImage, 20 YEARS OF fMRI* 20 YEARS OF fMRI 62, 774–781.  
921 <https://doi.org/10.1016/j.neuroimage.2012.01.021>

922 Fischl, B., Salat, D.H., Busa, E., Albert, M., Dieterich, M., Haselgrove, C., van der Kouwe, A., Killiany,  
923 R., Kennedy, D., Klaveness, S., Montillo, A., Makris, N., Rosen, B., Dale, A.M., 2002. Whole  
924 brain segmentation: automated labeling of neuroanatomical structures in the human brain.  
925 *Neuron* 33, 341–355.

- 926 Fukutomi, H., Glasser, M.F., Zhang, H., Autio, J.A., Coalson, T.S., Okada, T., Togashi, K., Van Essen,  
927 D.C., Hayashi, T., 2018. Neurite imaging reveals microstructural variations in human cerebral  
928 cortical gray matter. *NeuroImage*. <https://doi.org/10.1016/j.neuroimage.2018.02.017>
- 929 Gilbert, K.M., Gati, J.S., Barker, K., Everling, S., Menon, R.S., 2016. Optimized parallel transmit and  
930 receive radiofrequency coil for ultrahigh-field MRI of monkeys. *NeuroImage* 125, 153–161.  
931 <https://doi.org/10.1016/j.neuroimage.2015.10.048>
- 932 Glasser, M.F., Coalson, T.S., Bijsterbosch, J.D., Harrison, S.J., Harms, M.P., Anticevic, A., Essen, D.C.V.,  
933 Smith, S.M., 2017. Using Temporal ICA to Selectively Remove Global Noise While Preserving  
934 Global Signal in Functional MRI Data. *bioRxiv* 193862. <https://doi.org/10.1101/193862>
- 935 Glasser, M.F., Coalson, T.S., Bijsterbosch, J.D., Harrison, S.J., Harms, M.P., Anticevic, A., Van Essen,  
936 D.C., Smith, S.M., 2018. Using temporal ICA to selectively remove global noise while  
937 preserving global signal in functional MRI data. *NeuroImage* 181, 692–717.  
938 <https://doi.org/10.1016/j.neuroimage.2018.04.076>
- 939 Glasser, M.F., Coalson, T.S., Robinson, E.C., Hacker, C.D., Harwell, J., Yacoub, E., Ugurbil, K.,  
940 Andersson, J., Beckmann, C.F., Jenkinson, M., Smith, S.M., Van Essen, D.C., 2016a. A multi-  
941 modal parcellation of human cerebral cortex. *Nature* 536, 171–178.  
942 <https://doi.org/10.1038/nature18933>
- 943 Glasser, M.F., Goyal, M.S., Preuss, T.M., Raichle, M.E., Van Essen, D.C., 2014. Trends and properties  
944 of human cerebral cortex: Correlations with cortical myelin content. *NeuroImage, In-vivo*  
945 *Brodman Mapping of the Human Brain* 93, Part 2, 165–175.  
946 <https://doi.org/10.1016/j.neuroimage.2013.03.060>
- 947 Glasser, M.F., Smith, S.M., Marcus, D.S., Andersson, J.L.R., Auerbach, E.J., Behrens, T.E.J., Coalson,  
948 T.S., Harms, M.P., Jenkinson, M., Moeller, S., Robinson, E.C., Sotiropoulos, S.N., Xu, J.,  
949 Yacoub, E., Ugurbil, K., Essen, D.C.V., 2016b. The Human Connectome Project’s  
950 neuroimaging approach. *Nat. Neurosci.* 19, 1175–1187. <https://doi.org/10.1038/nn.4361>
- 951 Glasser, M.F., Sotiropoulos, S.N., Wilson, J.A., Coalson, T.S., Fischl, B., Andersson, J.L., Xu, J., Jbabdi,  
952 S., Webster, M., Polimeni, J.R., Van Essen, D.C., Jenkinson, M., 2013. The minimal  
953 preprocessing pipelines for the Human Connectome Project. *NeuroImage* 80, 105–124.  
954 <https://doi.org/10.1016/j.neuroimage.2013.04.127>
- 955 Glasser, M.F., Van Essen, D.C., 2011. Mapping Human Cortical Areas In Vivo Based on Myelin  
956 Content as Revealed by T1- and T2-Weighted MRI. *J. Neurosci.* 31, 11597–11616.  
957 <https://doi.org/10.1523/JNEUROSCI.2180-11.2011>
- 958 Goense, J.B.M., Logothetis, N.K., 2008. Neurophysiology of the BOLD fMRI Signal in Awake Monkeys.  
959 *Curr. Biol.* 18, 631–640. <https://doi.org/10.1016/j.cub.2008.03.054>
- 960 Gomori, J.M., Holland, G.A., Grossman, R.I., Geftter, W.B., Lenkinski, R.E., 1988. Fat suppression by  
961 section-select gradient reversal on spin-echo MR imaging. *Work in progress. Radiology* 168,  
962 493–495. <https://doi.org/10.1148/radiology.168.2.3393670>
- 963 Gonzalez-Castillo, J., Duthie, K.N., Saad, Z.S., Chu, C., Bandettini, P.A., Luh, W.-M., 2013. Effects of  
964 image contrast on functional MRI image registration. *NeuroImage* 67, 163–174.  
965 <https://doi.org/10.1016/j.neuroimage.2012.10.076>
- 966 Greve, D.N., Fischl, B., 2009. Accurate and robust brain image alignment using boundary-based  
967 registration. *NeuroImage* 48, 63–72. <https://doi.org/10.1016/j.neuroimage.2009.06.060>
- 968 Griffanti, L., Douaud, G., Bijsterbosch, J., Evangelisti, S., Alfaro-Almagro, F., Glasser, M.F., Duff, E.P.,  
969 Fitzgibbon, S., Westphal, R., Carone, D., Beckmann, C.F., Smith, S.M., 2017. Hand  
970 classification of fMRI ICA noise components. *NeuroImage, Cleaning up the fMRI time series:*  
971 *Mitigating noise with advanced acquisition and correction strategies* 154, 188–205.  
972 <https://doi.org/10.1016/j.neuroimage.2016.12.036>
- 973 Griffanti, L., Salimi-Khorshidi, G., Beckmann, C.F., Auerbach, E.J., Douaud, G., Sexton, C.E., Zsoldos,  
974 E., Ebmeier, K.P., Filippini, N., Mackay, C.E., Moeller, S., Xu, J., Yacoub, E., Baselli, G., Ugurbil,  
975 K., Miller, K.L., Smith, S.M., 2014. ICA-based artefact removal and accelerated fMRI



- 976 acquisition for improved resting state network imaging. *NeuroImage* 95, 232–247.  
977 <https://doi.org/10.1016/j.neuroimage.2014.03.034>
- 978 Griswold, M.A., Jakob, P.M., Heidemann, R.M., Nittka, M., Jellus, V., Wang, J., Kiefer, B., Haase, A.,  
979 2002. Generalized autocalibrating partially parallel acquisitions (GRAPPA). *Magn. Reson.*  
980 *Med.* 47, 1202–1210. <https://doi.org/10.1002/mrm.10171>
- 981 Helms, G., Garea-Rodriguez, E., Schlumbohm, C., König, J., Dechent, P., Fuchs, E., Wilke, M., 2013.  
982 Structural and quantitative neuroimaging of the common marmoset monkey using a clinical  
983 MRI system. *J. Neurosci. Methods* 215, 121–131.  
984 <https://doi.org/10.1016/j.jneumeth.2013.02.011>
- 985 Herculano-Houzel, S., Collins, C.E., Wong, P., Kaas, J.H., 2007. Cellular scaling rules for primate  
986 brains. *Proc. Natl. Acad. Sci.* 104, 3562–3567. <https://doi.org/10.1073/pnas.0611396104>
- 987 Hernández, M., Guerrero, G.D., Cecilia, J.M., García, J.M., Inuggi, A., Jbabdi, S., Behrens, T.E.J.,  
988 Sotiropoulos, S.N., 2013. Accelerating Fibre Orientation Estimation from Diffusion Weighted  
989 Magnetic Resonance Imaging Using GPUs. *PLOS ONE* 8, e61892.  
990 <https://doi.org/10.1371/journal.pone.0061892>
- 991 Hernandez-Fernandez, M., Reguly, I., Jbabdi, S., Giles, M., Smith, S., Sotiropoulos, S.N., 2018. Using  
992 GPUs to accelerate computational diffusion MRI: From microstructure estimation to  
993 tractography and connectomes. *NeuroImage* 188, 598–615.  
994 <https://doi.org/10.1016/j.neuroimage.2018.12.015>
- 995 Hutchison, R.M., Leung, L.S., Mirsattari, S.M., Gati, J.S., Menon, R.S., Everling, S., 2011. Resting-state  
996 networks in the macaque at 7 T. *NeuroImage* 56, 1546–1555.  
997 <https://doi.org/10.1016/j.neuroimage.2011.02.063>
- 998 Janssens, T., Keil, B., Serano, P., Mareyam, A., McNab, J.A., Wald, L.L., Vanduffel, W., 2013. A 22-  
999 channel receive array with Helmholtz transmit coil for anesthetized macaque MRI at 3 T.  
1000 *NMR Biomed.* 26, 1431–1440. <https://doi.org/10.1002/nbm.2970>
- 1001 Jbabdi, S., Lehman, J.F., Haber, S.N., Behrens, T.E., 2013. Human and monkey ventral prefrontal  
1002 fibers use the same organizational principles to reach their targets: tracing versus  
1003 tractography. *J. Neurosci. Off. J. Soc. Neurosci.* 33, 3190–3201.  
1004 <https://doi.org/10.1523/JNEUROSCI.2457-12.2013>
- 1005 Jbabdi, S., Sotiropoulos, S.N., Savio, A.M., Graña, M., Behrens, T.E.J., 2012. Model-based analysis of  
1006 multishell diffusion MR data for tractography: how to get over fitting problems. *Magn.*  
1007 *Reson. Med.* 68, 1846–1855. <https://doi.org/10.1002/mrm.24204>
- 1008 Jenkinson, M., Bannister, P., Brady, M., Smith, S., 2002. Improved Optimization for the Robust and  
1009 Accurate Linear Registration and Motion Correction of Brain Images. *NeuroImage* 17, 825–  
1010 841. <https://doi.org/10.1006/nimg.2002.1132>
- 1011 Khachaturian, M.H., 2010. A 4-channel 3 Tesla phased array receive coil for awake rhesus monkey  
1012 fMRI and diffusion MRI experiments. *J. Biomed. Sci. Eng.* 3, 1085–1092.  
1013 <https://doi.org/10.4236/jbise.2010.311141>
- 1014 Kudomi, N., Hayashi, T., Teramoto, N., Watabe, H., Kawachi, N., Ohta, Y., Kim, K.M., Iida, H., 2005.  
1015 Rapid quantitative measurement of CMRO(2) and CBF by dual administration of (15)O-  
1016 labeled oxygen and water during a single PET scan—a validation study and error analysis in  
1017 anesthetized monkeys. *J Cereb Blood Flow Metab* 25, 1209–24.
- 1018 Mandeville, J.B., Marota, J.J.A., Kosofsky, B.E., Keltner, J.R., Weissleder, R., Rosen, B.R., Weisskoff,  
1019 R.M., 1998. Dynamic functional imaging of relative cerebral blood volume during rat  
1020 forepaw stimulation. *Magn. Reson. Med.* 39, 615–624.  
1021 <https://doi.org/10.1002/mrm.1910390415>
- 1022 Marcus, D.S., Harms, M.P., Snyder, A.Z., Jenkinson, M., Wilson, J.A., Glasser, M.F., Barch, D.M.,  
1023 Archie, K.A., Burgess, G.C., Ramaratnam, M., Hodge, M., Horton, W., Herrick, R., Olsen, T.,  
1024 McKay, M., House, M., Hileman, M., Reid, E., Harwell, J., Coalson, T., Schindler, J., Elam, J.S.,  
1025 Curtiss, S.W., Van Essen, D.C., 2013. Human Connectome Project informatics: Quality



- 1026 control, database services, and data visualization. *NeuroImage* 80, 202–219.  
1027 <https://doi.org/10.1016/j.neuroimage.2013.05.077>
- 1028 Mareyam, A., Blau, J., Polimeni, J., Keil, B., Farivar, R., Benner, T., Vanduffel, W., Wald, L.L., 1823.  
1029 Eight-channel array coil optimized for functional imaging of awake monkeys at 7T, in: *Proc.*  
1030 *Intl. Soc. Mag. Reson. Med.* p. 2011.
- 1031 Markov, N.T., Ercsey-Ravasz, M.M., Gomes, R., R, A., Lamy, C., Magrou, L., Vezoli, J., Misery, P.,  
1032 Falchier, A., Quilodran, R., Gariel, M.A., Sallet, J., Gamanut, R., Huissoud, C., Clavagnier, S.,  
1033 Giroud, P., Sappey-Mariniere, D., Barone, P., Dehay, C., Toroczkai, Z., Knoblauch, K., Essen, V.,  
1034 C, D., Kennedy, H., 2014. A Weighted and Directed Interareal Connectivity Matrix for  
1035 Macaque Cerebral Cortex. *Cereb. Cortex* 24, 17–36. <https://doi.org/10.1093/cercor/bhs270>
- 1036 Mars, R.B., Passingham, R.E., Jbabdi, S., 2018a. Connectivity Fingerprints: From Areal Descriptions to  
1037 Abstract Spaces. *Trends Cogn. Sci.* 22, 1026–1037.  
1038 <https://doi.org/10.1016/j.tics.2018.08.009>
- 1039 Mars, R.B., Sotiropoulos, S.N., Passingham, R.E., Sallet, J., Verhagen, L., Khrapitchev, A.A., Sibson, N.,  
1040 Jbabdi, S., 2018b. Whole brain comparative anatomy using connectivity blueprints. *eLife* 7.  
1041 <https://doi.org/10.7554/eLife.35237>
- 1042 McKeown, M.J., Makeig, S., Brown, G.G., Jung, T.P., Kindermann, S.S., Bell, A.J., Sejnowski, T.J., 1998.  
1043 Analysis of fMRI data by blind separation into independent spatial components. *Hum. Brain*  
1044 *Mapp.* 6, 160–188.
- 1045 Mesulam, M.-M., Mufson, E.J., 1982. Insula of the old world monkey. III: Efferent cortical output and  
1046 comments on function. *J. Comp. Neurol.* 212, 38–52.  
1047 <https://doi.org/10.1002/cne.902120104>
- 1048 Moeller, S., Yacoub, E., Olman, C.A., Auerbach, E., Strupp, J., Harel, N., Uğurbil, K., 2010. Multiband  
1049 multislice GE-EPI at 7 tesla, with 16-fold acceleration using partial parallel imaging with  
1050 application to high spatial and temporal whole-brain fMRI. *Magn. Reson. Med.* 63, 1144–  
1051 1153. <https://doi.org/10.1002/mrm.22361>
- 1052 Mugler, J.P., Bao, S., Mulkern, R.V., Guttman, C.R.G., Robertson, R.L., Jolesz, F.A., Brookeman, J.R.,  
1053 2000. Optimized Single-Slab Three-dimensional Spin-Echo MR Imaging of the Brain.  
1054 *Radiology* 216, 891–899. <https://doi.org/10.1148/radiology.216.3.r00au46891>
- 1055 Mugler, J.P., Brookeman, J.R., 1990. Three-dimensional magnetization-prepared rapid gradient-echo  
1056 imaging (3D MP RAGE). *Magn. Reson. Med.* 15, 152–157.  
1057 <https://doi.org/10.1002/mrm.1910150117>
- 1058 Passingham, R., 2009. How good is the macaque monkey model of the human brain? *Curr. Opin.*  
1059 *Neurobiol., Cognitive neuroscience* 19, 6–11. <https://doi.org/10.1016/j.conb.2009.01.002>
- 1060 Power, J.D., 2016. A simple but useful way to assess fMRI scan qualities. *NeuroImage*.  
1061 Power, J.D., Mitra, A., Laumann, T.O., Snyder, A.Z., Schlaggar, B.L., Petersen, S.E., 2014. Methods to  
1062 detect, characterize, and remove motion artifact in resting state fMRI. *NeuroImage* 84, 320–  
1063 341. <https://doi.org/10.1016/j.neuroimage.2013.08.048>
- 1064 Rilling, J.K., Glasser, M.F., Preuss, T.M., Ma, X., Zhao, T., Hu, X., Behrens, T.E.J., 2008. The evolution  
1065 of the arcuate fasciculus revealed with comparative DTI. *Nat. Neurosci.* 11, 426–428.  
1066 <https://doi.org/10.1038/nn2072>
- 1067 Robinson, E.C., Garcia, K., Glasser, M.F., Chen, Z., Coalson, T.S., Makropoulos, A., Bozek, J., Wright,  
1068 R., Schuh, A., Webster, M., Hutter, J., Price, A., Cordero Grande, L., Hughes, E., Tusor, N.,  
1069 Bayly, P.V., Van Essen, D.C., Smith, S.M., Edwards, A.D., Hajnal, J., Jenkinson, M., Glocker, B.,  
1070 Rueckert, D., 2018. Multimodal surface matching with higher-order smoothness constraints.  
1071 *NeuroImage* 167, 453–465. <https://doi.org/10.1016/j.neuroimage.2017.10.037>
- 1072 Robinson, E.C., Jbabdi, S., Glasser, M.F., Andersson, J., Burgess, G.C., Harms, M.P., Smith, S.M., Van  
1073 Essen, D.C., Jenkinson, M., 2014. MSM: A new flexible framework for Multimodal Surface  
1074 Matching. *NeuroImage* 100, 414–426. <https://doi.org/10.1016/j.neuroimage.2014.05.069>
- 1075 Roemer, P.B., Edelstein, W.A., Hayes, C.E., Souza, S.P., Mueller, O.M., 1990. The NMR phased array.  
1076 *Magn. Reson. Med.* 16, 192–225. <https://doi.org/10.1002/mrm.1910160203>

- 1077 Salimi-Khorshidi, G., Douaud, G., Beckmann, C.F., Glasser, M.F., Griffanti, L., Smith, S.M., 2014.  
1078 Automatic denoising of functional MRI data: Combining independent component analysis  
1079 and hierarchical fusion of classifiers. *NeuroImage* 90, 449–468.  
1080 <https://doi.org/10.1016/j.neuroimage.2013.11.046>
- 1081 Setsompop, K., Cohen-Adad, J., Gagoski, B.A., Raij, T., Yendiki, A., Keil, B., Wedeen, V.J., Wald, L.L.,  
1082 2012. Improving diffusion MRI using simultaneous multi-slice echo planar imaging.  
1083 *NeuroImage* 63, 569–580. <https://doi.org/10.1016/j.neuroimage.2012.06.033>
- 1084 Smith, R.E., Tournier, J.-D., Calamante, F., Connelly, A., 2012. Anatomically-constrained tractography:  
1085 improved diffusion MRI streamlines tractography through effective use of anatomical  
1086 information. *NeuroImage* 62, 1924–1938.  
1087 <https://doi.org/10.1016/j.neuroimage.2012.06.005>
- 1088 Smith, S.M., Beckmann, C.F., Andersson, J., Auerbach, E.J., Bijsterbosch, J., Douaud, G., Duff, E.,  
1089 Feinberg, D.A., Griffanti, L., Harms, M.P., others, 2013. Resting-state fMRI in the human  
1090 connectome project. *Neuroimage* 80, 144–168.
- 1091 Sotiropoulos, S.N., Hernández-Fernández, M., Vu, A.T., Andersson, J.L., Moeller, S., Yacoub, E.,  
1092 Lenglet, C., Ugurbil, K., Behrens, T.E.J., Jbabdi, S., 2016. Fusion in diffusion MRI for improved  
1093 fibre orientation estimation: An application to the 3T and 7T data of the Human Connectome  
1094 Project. *NeuroImage* 134, 396–409. <https://doi.org/10.1016/j.neuroimage.2016.04.014>
- 1095 Sotiropoulos, S.N., Jbabdi, S., Xu, J., Andersson, J.L., Moeller, S., Auerbach, E.J., Glasser, M.F.,  
1096 Hernandez, M., Sapiro, G., Jenkinson, M., Feinberg, D.A., Yacoub, E., Lenglet, C., Van Essen,  
1097 D.C., Ugurbil, K., Behrens, T.E.J., 2013. Advances in diffusion MRI acquisition and processing  
1098 in the Human Connectome Project. *NeuroImage* 80, 125–143.  
1099 <https://doi.org/10.1016/j.neuroimage.2013.05.057>
- 1100 Stejskal, E.O., Tanner, J.E., 1965. Spin Diffusion Measurements: Spin Echoes in the Presence of a  
1101 Time-Dependent Field Gradient. *J. Chem. Phys.* 42, 288. <https://doi.org/10.1063/1.1695690>
- 1102 Ugurbil, K., Xu, J., Auerbach, E.J., Moeller, S., Vu, A.T., Duarte-Carvajalino, J.M., Lenglet, C., Wu, X.,  
1103 Schmitter, S., Van de Moortele, P.F., Strupp, J., Sapiro, G., De Martino, F., Wang, D., Harel,  
1104 N., Garwood, M., Chen, L., Feinberg, D.A., Smith, S.M., Miller, K.L., Sotiropoulos, S.N., Jbabdi,  
1105 S., Andersson, J.L.R., Behrens, T.E.J., Glasser, M.F., Van Essen, D.C., Yacoub, E., 2013. Pushing  
1106 spatial and temporal resolution for functional and diffusion MRI in the Human Connectome  
1107 Project. *NeuroImage, Mapping the Connectome* 80, 80–104.  
1108 <https://doi.org/10.1016/j.neuroimage.2013.05.012>
- 1109 Van de Moortele, P.-F., Auerbach, E.J., Olman, C., Yacoub, E., Ugurbil, K., Moeller, S., 2009. T1  
1110 weighted Brain Images at 7 Tesla Unbiased for Proton Density, T2\* contrast and RF Coil  
1111 Receive B1 Sensitivity with Simultaneous Vessel Visualization. *NeuroImage* 46, 432–446.  
1112 <https://doi.org/10.1016/j.neuroimage.2009.02.009>
- 1113 Van Essen, D.C., Dierker, D.L., 2007. Surface-Based and Probabilistic Atlases of Primate Cerebral  
1114 Cortex. *Neuron* 56, 209–225. <https://doi.org/10.1016/j.neuron.2007.10.015>
- 1115 Van Essen, D.C., Glasser, M.F., Dierker, D.L., Harwell, J., 2011. Cortical Parcellations of the Macaque  
1116 Monkey Analyzed on Surface-Based Atlases. *Cereb. Cortex* bhr290.  
1117 <https://doi.org/10.1093/cercor/bhr290>
- 1118 Van Essen, D.C., Glasser, M.F., 2018. Parcellating Cerebral Cortex: How Invasive Animal Studies  
1119 Inform Noninvasive Mapmaking in Humans. *Neuron* 99, 640–663.  
1120 <https://doi.org/10.1016/j.neuron.2018.07.002>
- 1121 Van Essen, D.C., Lewis, J.W., Drury, H.A., Hadjikhani, N., Tootell, R.B., Bakircioglu, M., Miller, M.I.,  
1122 2001. Mapping visual cortex in monkeys and humans using surface-based atlases. *Vision Res.*  
1123 41, 1359–1378. [https://doi.org/10.1016/S0042-6989\(01\)00045-1](https://doi.org/10.1016/S0042-6989(01)00045-1)
- 1124 Van Essen, D.C., Smith, J., Glasser, M.F., Elam, J., Donahue, C.J., Dierker, D.L., Reid, E.K., Coalson, T.,  
1125 Harwell, J., 2017. The Brain Analysis Library of Spatial maps and Atlases (BALSA) database.  
1126 *NeuroImage, Data Sharing Part II* 144, 270–274.  
1127 <https://doi.org/10.1016/j.neuroimage.2016.04.002>

- 1128 Wang, L., Saalman, Y.B., Pinski, M.A., Arcaro, M.J., Kastner, S., 2012. Electrophysiological Low-  
1129 Frequency Coherence and Cross-Frequency Coupling Contribute to BOLD Connectivity.  
1130 *Neuron* 76, 1010–1020. <https://doi.org/10.1016/j.neuron.2012.09.033>
- 1131 Wiggins, G. c., Triantafyllou, C., Potthast, A., Reykowski, A., Nittka, M., Wald, L. I., 2006. 32-channel 3  
1132 Tesla receive-only phased-array head coil with soccer-ball element geometry. *Magn. Reson.*  
1133 *Med.* 56, 216–223. <https://doi.org/10.1002/mrm.20925>
- 1134 Wiggins, G.C., Polimeni, J.R., Potthast, A., Schmitt, M., Alagappan, V., Wald, L.L., 2009. 96-Channel  
1135 receive-only head coil for 3 Tesla: design optimization and evaluation. *Magn. Reson. Med.*  
1136 *Off. J. Soc. Magn. Reson. Med. Soc. Magn. Reson. Med.* 62, 754–762.  
1137 <https://doi.org/10.1002/mrm.22028>
- 1138 Zhang, H., Schneider, T., Wheeler-Kingshott, C.A., Alexander, D.C., 2012. NODDI: Practical in vivo  
1139 neurite orientation dispersion and density imaging of the human brain. *NeuroImage* 61,  
1140 1000–1016. <https://doi.org/10.1016/j.neuroimage.2012.03.072>
- 1141 Zhang, Y., Brady, M., Smith, S., 2001. Segmentation of brain MR images through a hidden Markov  
1142 random field model and the expectation-maximization algorithm. *IEEE Trans. Med. Imaging*  
1143 20, 45–57. <https://doi.org/10.1109/42.906424>
- 1144
